# Supplementary material for: Identification of an IRGP Signature to Predict Prognosis and Immunotherapeutic Efficiency in Bladder Cancer
Source: Front Mol Biosci. 2021 Apr 15;8:607090. doi: 10.3389/fmolb.2021.607090 (PMC8082411; doi:10.3389/fmolb.2021.607090)
Supplement: Supplementary File 1 — The raw data of ESTIMATE algorithm scores. [file Table_1.XLSX]

## Sheet: Sheet1
Mixture	Subtype	B cells naive	B cells memory	Plasma cells	T cells CD8	T cells CD4 naive	T cells CD4 memory resting	T cells CD4 memory activated	T cells follicular helper	T cells regulatory (Tregs)	T cells gamma delta	NK cells resting	NK cells activated	Monocytes	Macrophages M0	Macrophages M1	Macrophages M2	Dendritic cells resting	Dendritic cells activated	Mast cells resting	Mast cells activated	Eosinophils	Neutrophils
TCGA-CF-A5U8	low risk	0.0370536	0	0.151645	0.291414	0	0.0780066	0	0	0	0	0	0.104872	0	0.0632079	0.0162425	0.076629	0.0239118	0.0366787	0.0553937	0	0	0.0649451
TCGA-ZF-A9R7	low risk	0.0516319	0	0.0165939	0.358743	0	0	0.0767112	0.170947	0.0563773	0	0.0424922	0.0536622	0.0106227	0.0119072	0.0541496	0.0573547	0.0139164	0	0.0248902	0	0	0
TCGA-G2-A2EK	low risk	0.0868422	0.11285	0.0133962	0.0626694	0	0.235633	0.00353297	0	0.109326	0	0	0.0564571	0.00323455	0.058204	0	0.0459748	0.0500723	0.0754389	0.0863693	0	0	0
TCGA-ZF-A9R4	low risk	0.00807697	0.000958563	0.00659483	0.170588	0	0.114113	0.160362	0.0677268	0	0.00208013	0.0198583	0.0638689	0	0.0332221	0.109175	0.155568	0.0219709	0.00392388	0.0619128	0	0	0
TCGA-GU-A763	low risk	0	0.0257318	0	0.229617	0	0.112365	0	0.117497	0	0	0	0.116025	0.0134764	0	0.0406029	0.103547	0.144614	0.0131538	0.0814569	0	0.00191332	0
TCGA-K4-A5RJ	low risk	0.00222101	0	0.000883478	0.307123	0	0	0.0929616	0.0426865	0.0379268	0.0112753	0	0	0.00302107	0.0255734	0.0862998	0.298171	0.0771657	0	0.0124532	0	0	0.00223833
TCGA-GV-A3JZ	low risk	0.119388	0	0.0513533	0.0802518	0	0.0811614	0.0403652	0.0193829	0.0136037	0	0	0.0320713	0	0.19386	0.069044	0.206035	0.0729501	0	0.0195794	0	0	0.000953699
TCGA-CF-A5UA	low risk	0	0.0763273	0.0114004	0.19246	0	0.0358461	0	0.0697599	0.0544887	0	0	0.037795	0	0.114699	0	0.160655	0.179411	0.0218241	0.0453352	0	0	0
TCGA-BT-A3PJ	low risk	0	0	0.00318899	0.126276	0	0.125269	0.106737	0.0640067	0.0117707	0	0.0265324	0.0129425	0	0.135386	0.15963	0.14362	0.00650896	0.00362937	0	0.0701801	0	0.00432207
TCGA-XF-AAN5	low risk	0.0104854	0	0.00584596	0.115609	0	0.20451	0.179661	0.00337697	0	0	0.0582128	0	0	0.0942564	0.117424	0.11093	0.0364139	0	0.0357801	0.00698295	0.0205114	0
TCGA-FD-A3N6	low risk	0	0.0101011	0.00517072	0.119823	0	0.0824184	0.00273774	0.084805	0	0	0.0324105	0	0.016909	0.292406	0.279981	0	0.0275918	0	0	0.0246167	0.0210297	0
TCGA-DK-A6B0	low risk	0	0	0.000266979	0.100959	0	0.151366	0	0.0260021	0.0145992	0	0	0.0728419	0.113648	0.0987471	0.0210285	0.216004	0.00433637	0.0146992	0.165502	0	0	0
TCGA-4Z-AA89	low risk	0	0.054998	0	0.165607	0	0.00208884	0	0.248958	0	0	0	0.0268748	0.000979674	0	0.192571	0.166501	0.0237335	0.0803849	0.0373039	0	0	0
TCGA-CF-A47X	low risk	0.00879531	0.0822853	0.0363177	0.172796	0	0.247345	0	0.0518885	0	0	0	0.0171153	0.0507352	0	0	0.0223051	0.132255	0.112191	0	0.0608456	0.00362062	0.0015037
TCGA-CF-A47V	low risk	0.0063911	0.0260212	0.0107861	0.306406	0	0	0.0255306	0.0498836	0.0221823	0	0	0.0335061	0.0382894	0	0.0452909	0.100615	0.16315	0.0848822	0.0870661	0	0	0
TCGA-CF-A47Y	low risk	0.0198875	0	0.0682844	0.394789	0	0.0978695	0	0	0.00701967	0	0	0.0318362	0	0	0.0147815	0.197382	0.0819053	0.0482303	0.0130775	0	0	0.0249367
TCGA-FD-A43X	low risk	0	0.0869612	0.0751728	0.134611	0	0.127567	0	0.0424917	0.0118949	0	0.0811473	0	0.028297	0.128931	0.00647222	0.17693	0	0.0120245	0.0874992	0	0	0
TCGA-UY-A9PH	low risk	0.016143	0	0.0597008	0.181929	0	0.0352253	0.14657	0.02634	0	0	0	0.0756929	0.00146052	0.0177186	0.102621	0.199774	0.0200102	0.0148939	0.0953306	0	0	0.00659037
TCGA-E7-A6ME	low risk	0.0522766	0	0.00457676	0.360008	0	0.0663426	0.0349695	0.150551	0.0409527	0	0	0.0364525	0.00157268	0.0413007	0.0667469	0.0761235	0	0.0468717	0.0172103	0	0	0.00404387
TCGA-ZF-A9R5	low risk	0	0.0376978	0.020729	0.192951	0	0.363066	0.0263962	0.0453294	0.0120618	0	0.0583951	0	0.0200813	0.0209687	0.0163985	0.0773347	0	0.0195219	0.0890685	0	0	0
TCGA-DK-A6B6	low risk	0.0605912	0	0.115102	0.0349376	0	0.0633837	0.0927829	0.0753623	0.0727447	0.202661	0.00475732	0	0	0.0381355	0.0589254	0.0547612	0.00956571	0.0651241	0.0501742	0	0	0.00099174
TCGA-DK-A1AG	low risk	0.0174113	0	0.0134126	0.0562117	0	0.369602	0.0275815	0	0.0151798	0.0737132	0	0.0506028	0.026361	0.0578477	0	0.0750799	0.0109501	0.0622552	0.0480344	0	0	0.0957573
TCGA-KQ-A41O	low risk	0	0	0.0524697	0.640636	0	0	0	0.00044675	0	0	0.0393348	0.0182909	0.0240394	0	0	0.121205	0	0.103578	0	0	0	0
TCGA-4Z-AA7W	low risk	0.00633257	0	0.0652056	0.410094	0	0	0.119094	0.0823644	0.00463358	0	0.0326718	0.04781	0.00258911	0.00412964	0.0693076	0.0951436	0.0144759	0.0279771	0.0181704	0	0	0
TCGA-GC-A3RC	low risk	0.00921713	0	0.00254475	0.104804	0	0.235966	0.00895993	0.0310216	0	0	0.0191774	0.026989	0	0.267764	0.0431956	0.182075	0.0252078	0.0330963	0.00998163	0	0	0
TCGA-GC-A3WC	low risk	0.0276961	0.0382127	0.0204024	0.156197	0	0.0518887	0.140894	0.0484204	0.0201688	0	0.00534299	0	0	0.0997814	0.137418	0.101704	0.100633	0	0.050232	0	0	0.00100851
TCGA-BT-A42E	low risk	0	0	0.000969125	0.143743	0	0.105886	0.0806317	0.0927565	0.0241668	0	0	0.0781221	0	0.104523	0.137647	0.131728	0.0814256	0.0161426	0	0.00225974	0	0
TCGA-ZF-AA58	low risk	0.0204337	0	0.00820302	0.112146	0	0.0904898	0.100422	0.0181083	0.0209084	0	0.0314985	0	0	0.250697	0.10971	0.216117	0	0	0	0.0164651	0	0.00480192
TCGA-ZF-A9R2	low risk	0	0.0557555	0.0326255	0.0863674	0	0.200848	0	0.197731	0	0	0	0.00784685	0.0139558	0.0129499	0	0.138771	0.086781	0.125075	0.0092156	0	0.0210802	0.0109972
TCGA-CU-A0YR	low risk	0.0504615	0	0.0173807	0.0950056	0	0.0741702	0.0171419	0.030165	0.00953524	0	0	0.0541935	0	0.340339	0.0621515	0.178555	0.0226831	0.0423007	0	0	0	0.0059175
TCGA-C4-A0F7	low risk	0	0.0514636	0	0.0822451	0	0.129199	0.00697146	0.0647986	0	0	0	0	0.0253638	0.0344965	0	0.158378	0.0617806	0.289291	0.005433	0.0686021	0	0.0219767
TCGA-XF-A8HI	low risk	0	0.0370091	0.0215261	0.0794774	0	0.287789	0.00293973	0.0234459	0.0782819	0	0	0	0	0.0584591	0	0.103612	0.0331573	0.147975	0	0.116445	0	0.009883
TCGA-E7-A519	low risk	0	0.0104554	0.0911491	0.119478	0	0.129827	0.00478868	0	0.124574	0	0.106588	0.00284079	0.0632441	0.176643	0	0.0602389	0.000437679	0.0941573	0.014883	0	0	0.000694474
TCGA-4Z-AA7Y	low risk	0	0.0056892	0	0.0853483	0	0.195852	0	0.0571844	0	0	0	0.135562	0.0471845	0.0757202	0	0.121123	0.0543028	0.164248	0.0516732	0	0	0.00611269
TCGA-4Z-AA81	low risk	0.0686555	0	0.0105827	0.333638	0	0	0.176097	0.091058	0	0	0	0.0462514	0.00327564	0	0.00217801	0.0744391	0	0.148646	0.0451796	0	0	0
TCGA-E7-A7DU	low risk	0	0.0281046	0.0151462	0.0640655	0	0.215931	0	0.0256343	0.0226889	0	0	0.0489912	0.0135367	0	0	0.261144	0	0.209127	0.0956298	0	0	0
TCGA-GC-A3I6	low risk	0	0	0.00532001	0.0366589	0	0.130223	0.0621488	0.055591	0	0	0.0275395	0.0518676	0	0.103815	0.150552	0.129849	0	0.12106	0.125375	0	0	0
TCGA-E7-A678	low risk	0	0	0.184255	0.134706	0	0.355114	0	0.000696006	0.0664716	0	0	0.0721039	0.00239431	0.0350917	0.017346	0.0335217	0	0.0400956	0.0582034	0	0	0
TCGA-LC-A66R	low risk	0	0.0130361	0.0339689	0.192303	0	0.11169	0.183253	0.0306081	0	0	0.0612284	0	0.00135248	0.0497609	0.0885969	0.145817	0	0.059399	0.0234896	0	0	0.00549597
TCGA-ZF-A9RL	low risk	0	0.0312925	0.0147882	0.262647	0.176727	0	0	0.0278379	0	0	0	0.0525783	0.00271892	0	0.0701821	0.043184	0.27826	0.0397837	0	0	0	0
TCGA-4Z-AA7O	low risk	0	0.0275107	0.0601512	0.23688	0	0.124832	0.00928367	0.137059	0.00771158	0.039314	0	0.0440903	0	0.00121141	0.0131378	0.0890902	0.0486997	0.119699	0.0343713	0	0	0.00695911
TCGA-DK-A1AA	low risk	0	0.036421	0	0	0	0.221541	0	0.0198435	0.0260196	0.0223961	0	0.0578966	0.0168345	0	0.0308089	0.117534	0.227887	0.101413	0.111967	0	0	0.00943782
TCGA-GD-A76B	low risk	0.0115891	0.00149724	0.0820248	0.142342	0	0.0275225	0.0963082	0.0444877	0.187418	0	0.00928916	0.034894	0.0161341	0.0174941	0.11783	0.0655781	0.130648	0.00903494	0	0.00256995	0.000856145	0.00248193
TCGA-FD-A62N	low risk	0.0356989	0	0.0562412	0.235403	0	0.0941109	0.108739	0.0182227	0.00973403	0	0	0	0.00456259	0.0518753	0.149029	0.126872	0.0607544	0	0.045151	0	0	0.00360658
TCGA-E7-A85H	low risk	0.0975538	0	0.0512157	0.155986	0	0	0.078994	0.0406321	0.0844844	0	0	0.0528724	0.00697633	0.0892588	0.0982858	0.0738444	0.116009	0	0.0538876	0	0	0
TCGA-GU-A766	low risk	0.00977218	0	0.0026028	0.136535	0	0.0149065	0.28309	0.0450052	0	0	0.0493141	0.00199292	0.0501645	0.0389926	0.195664	0.0514345	0	0.11284	0.00420977	0	0	0.00347598
TCGA-YC-A8S6	low risk	0	0.0111306	0	0.0172967	0	0.175442	0.0542356	0	0.0882047	0	0	0	0.0723865	0	0.00387712	0.108062	0.0604519	0.168985	0.0994591	0.0948482	0.0103178	0.0353033
TCGA-LT-A8JT	low risk	0.0250466	0.0477629	0	0.147016	0	0.336599	0	0.0972105	0.00698795	0	0	0.0119106	0.0300246	0.042498	0.0594686	0.0468394	0.0292927	0.0728277	0.0460865	0	0.000429628	0
TCGA-UY-A8OB	low risk	0	0	0.00164432	0.269998	0	0.117797	0.156745	0	0	0	0.0840097	0.0297387	0.0155823	0.106781	0.0450805	0.100648	0	0.0603378	0.0116382	0	0	0
TCGA-CF-A9FH	low risk	0.00727767	0	0	0.0762576	0	0.0432451	0	0.112159	0.0387173	0	0	0	0.0234946	0	0.0223325	0.00294776	0	0.428037	0.245531	0	0	0
TCGA-XF-A8HB	low risk	0	0.0775484	0	0	0	0.185552	0	0.0958212	0	0	0.00462852	0.0294097	0.0394169	0	0.00179568	0.2761	0.0722441	0.179949	0.0375343	0	0	0
TCGA-DK-A3WW	low risk	0.00898371	0	0.00547351	0.294338	0	0	0.242619	0.0512973	0.000956866	0	0.0671767	0	0	0.0171447	0.140012	0.109468	0.0318016	0.00910604	0.0147963	0	0	0.00682754
TCGA-XF-A9SH	low risk	0	0.0962155	0.0389366	0.0355982	0	0.0938816	0.00131883	0.0156523	0.0623358	0	0	0.0450452	0	0.128132	0.00724681	0.263593	0.103902	0.0217074	0.0826916	0	0.0017668	0.00197625
TCGA-PQ-A6FI	low risk	0.0190577	0	0.00502198	0.147226	0	0.116357	0.111758	0.0724895	0	0	0.0232022	0.0382108	0.0419078	0.0684149	0.0198106	0.0551192	0	0.229021	0.052364	0	0	3.91e-05
TCGA-DK-A6AV	low risk	0.220292	0	0.0140717	0.20413	0	0.0923822	0	0.118463	0.000415409	0	0	0.00981587	0.0172824	0.0782512	0.0554528	0.0481212	0.0171296	0.0896385	0	0.0244584	0.0100955	0
TCGA-ZF-AA51	low risk	0.0536355	0	0	0.159761	0	0.0982611	0.0730647	0.00219913	0.0743611	0	0.0427204	0	0.00318905	0.232242	0.155749	0.0564492	0.0156712	0	0	0.0221998	0	0.0104967
TCGA-CF-A47S	low risk	0	0.00945381	0.0328018	0.120931	0	0.0917891	0	0.0279549	0.148758	0	0	0.041911	0.0313052	0.0325547	0.105358	0	0.0964496	0.19403	0	0.0589672	0.00773491	0
TCGA-ZF-AA53	low risk	0.0103414	0	0.00237206	0.124871	0	0.108888	0.0437038	0.0467449	0.000928536	0	0	0.0618616	0.019323	0.0854251	0.167701	0.197944	0.0936726	0	0.0187425	0	0.0074606	0.0100195
TCGA-FD-A5BS	low risk	0	0.0326961	0.067322	0.247265	0	0.0754107	0.0582924	0.0485632	0.0483123	0	0.0188577	0.0437746	0.010262	0.119636	0.128143	0.0809267	0	0	0.017855	0	0	0.00268247
TCGA-CU-A3QU	low risk	0	0.039684	0.0139016	0	0	0.0816722	0	0.0187554	0.00943348	0.00601392	0.0619142	0	0.0891789	0.368879	0	0.0626686	0.0105598	0.075719	0	0.112617	0.0490038	0
TCGA-E7-A3Y1	low risk	0	0.0350875	0.0168654	0.160537	0	0.177897	0	0.108446	0.026672	0.0127039	0	0.106995	0.00217569	0	0.0317692	0.147318	0.0469929	0.000972357	0.125569	0	0	0
TCGA-GC-A3YS	low risk	0	0.00855582	0.00788206	0.0277353	0	0.247983	0	0.0197435	0.0336325	0	0.0330251	0.0535354	0	0.254601	0.016176	0.149691	0.0827805	0.0301823	0.0299953	0	0	0.00448202
TCGA-DK-A1AF	low risk	0.0269099	0	0	0.123923	0	0.137304	0.0482334	0.0291597	0.00559467	0	0	0.0279752	0.00584239	0.299081	0.0893426	0.110717	0.00904216	0	0	0.0600876	0.00589306	0.0208942
TCGA-XF-A9T8	low risk	0.000299394	0	0.00174365	0.213532	0	0.119761	0.111575	0.0353506	0	0	0.00378684	0.0107549	0	0.12144	0.0932224	0.131658	0.00157859	0.0506544	0.0262194	0	0.011183	0.0672411
TCGA-XF-A9SI	low risk	0.080468	0.00147105	0.0363546	0.241571	0	0.224653	0.0825357	0.0635114	0.0208032	0	0.00623242	0	0.00660288	0.0533132	0.115624	0.0511138	0.00208474	0	0.0136613	0	0	0
TCGA-XF-AAN2	low risk	0.0107099	0	0.00339216	0.209765	0	0.0818449	0.122982	0.0969127	0.00419548	0	0.0315956	0.017157	0	0.0952901	0.109772	0.11554	0	0.0714627	0.027013	0	0	0.00236695
TCGA-K4-A4AC	low risk	0	0	0.00948165	0.0590298	0	0.150648	0.095609	0.0207343	0	0	0.0283074	0	0.0265933	0.201348	0.0871645	0.251977	0.0391211	0.0114656	0.0114045	0.00711595	0	0
TCGA-CU-A3KJ	low risk	0	0	0.00229277	0.0970859	0	0.216886	0.0840866	0.0447587	0	0	0.0483844	0	0.00828625	0.157626	0.0698839	0.0808486	0.0315057	0.049947	0	0.0878914	0	0.0205168
TCGA-DK-A2I1	low risk	0.0886456	0	0.0751915	0.150322	0	0	0.0321254	0.00470859	0.0695386	0	0	0.0508104	0.00717316	0.11882	0.142935	0.142868	0.0556747	0	0.0592253	0	0	0.00196171
TCGA-FJ-A3ZE	low risk	0	0.0834087	0.0120006	0.179296	0	0.182339	0	0	0.0158644	0	0	0.0255968	1.15e-05	0.134016	0	0.050839	0	0.114657	0.192131	0	0.00983989	0
TCGA-DK-AA6L	low risk	0.0442774	0	0.0105814	0.0720021	0	0.0893108	0.0163338	0.0527443	0.0381855	0	0	0.0343629	0.00763442	0.235388	0.0487621	0.123912	0.190412	0	0.0360932	0	0	0
TCGA-DK-AA6M	low risk	0.00644823	0	0.00181606	0.0404279	0	0.20788	0.00187532	0.000414555	0.0152558	0	0	0.0855711	0.0312604	0	0.0687546	0.186491	0.237577	0	0.109383	0	0	0.00684503
TCGA-DK-A1AD	low risk	0.135232	0	0.0110321	0.246817	0	0	0.0730671	0.0280393	0.0552131	0.00641379	0	0	0.0276265	0.00827844	0.227869	0.106875	0.0262193	0.0362784	0	0.000895369	0.0101436	0
TCGA-CF-A3MG	low risk	0.0425388	0	0	0.0860889	0	0.269692	0	0	0	0	0.0023917	0.0224138	0.0448141	0.0969696	0	0.00733541	0.11816	0.0623627	0.247233	0	0	0
TCGA-CF-A8HX	low risk	0	0.112332	0.0374455	0	0.0700767	0.190351	0	0	0.00625314	0	0.0281378	0.0113544	0.00723816	0	0	0.158414	0.15232	0.222291	0	0	0.00242172	0.00136463
TCGA-G2-AA3B	low risk	0.0382022	0	0.0160779	0.140773	0	0	0.275879	0.140981	0.0778409	0	0.0898043	0	0.00162953	0.00564633	0.0393078	0.0540774	0.00812145	0.0954208	0.0162382	0	0	0
TCGA-FD-A43P	low risk	0.0909936	0	0.0135067	0.274013	0	0	0.1482	0.0407651	0.0611039	0.0437115	0	0.0206318	0	0.114273	0.100413	0.0466682	0	0	0.0457199	0	0	0
TCGA-FJ-A3Z9	low risk	0	0.0141219	0.0130659	0	0.131884	0.0767478	0	0	0.0110423	0	0	0.111225	0.0130446	0.319953	0.00219613	0.0335599	0.0903113	0.0940231	0.0888252	0	0	0
TCGA-XF-A8HG	low risk	0	0.0878361	0	0.0565016	0.00215057	0.0404829	0	0	0	0	0.0440483	0	0.0520201	0.0289836	0.000117747	0.282908	0.279731	0.0874404	0.0335796	0	0	0.00420014
TCGA-XF-A9T5	low risk	0.114832	0	0.0860837	0.138029	0	0.116147	0.0668153	0.0432766	0.0258648	0	0.00630176	0	0	0.147763	0.0925978	0.0912649	0.0477846	0	0.0213803	0	0	0.0018586
TCGA-XF-A9SM	low risk	0.0121775	0	0.00183105	0.218855	0	0.106135	0.189667	0.0347809	0.00560419	0	0.0263887	0.000897909	0.0054033	0.0424552	0.0764156	0.215194	0.0153634	0	0.0431025	0	0	0.00572889
TCGA-KQ-A41N	low risk	0	0.160541	0.0490106	0.0566279	0	0.132386	0	0.0520171	0	0	0.0234061	0	0.0026258	0.130795	0	0.155498	0.0316705	0.131909	0.0543256	0.0191869	0	0
TCGA-CF-A9FM	low risk	0	0	0	0.0894565	0	0.142596	0	0.00664362	0.0860487	0	0	0.0879332	0.015188	0.0379975	0.045616	0.0962432	0.0956703	0.190898	0	0.0661794	0	0.0395295
TCGA-GV-A3JX	low risk	0.0948438	0	0.0162492	0.15369	0	0.13702	0.0432878	0.0899358	0.0268592	0	0.0257363	0	0	0.0513358	0.0998988	0.214356	0.0194977	0.0175543	0.00973612	0	0	0
TCGA-FD-A3B4	low risk	0.170378	0	0.077775	0.147582	0	0.0550236	0.0717971	0.040166	0.00535082	0	0	0.0025593	0	0.146462	0.123747	0.108194	0	0.0030779	0.0458076	0	0	0.00208043
TCGA-DK-A2I4	low risk	0.0819611	0	0.0403531	0.171724	0	0.153099	0.0930181	0.031586	0	0	0	0.0456392	0.0121701	0.0458583	0.076613	0.168328	0.0171504	0	0.0556481	0	0	0.00685158
TCGA-E7-A6MF	low risk	0	0.048376	0	0.13652	0	0.251159	0	0.0872355	0.0254592	0	0	0.0322845	0.107321	0	0.0263436	0.155065	0.0589556	0.0330563	0.0295248	0	0	0.00869903
TCGA-BT-A20N	low risk	0.197489	0	0.146355	0.0647413	0	0.0916767	0.0227909	0.0576862	0	0	0	0	0.00738735	0.0462873	0.144372	0.0870748	0.0963206	0.0110084	0	0.00868234	0	0.0181287
TCGA-KQ-A41Q	low risk	0	0.109291	0.0165893	0.0737354	0.0952033	0	0.0017327	0	0.0322723	0	0.0730896	0	0.0318658	0.160511	0	0.0441198	0	0.217986	0	0.120186	0.0234184	0
TCGA-FD-A6TD	low risk	0.0264313	0.00362785	0.00014149	0.134453	0	0.114018	0.0626877	0.0188984	0	0	0	0.059591	0	0.127877	0.0873176	0.272684	0.0321784	0.0147779	0.0453166	0	0	0
TCGA-XF-A8HF	low risk	0.0344531	0.0044685	0.00465214	0.121401	0	0.108345	0.00126591	0	0.0650769	0	0.0569589	0	0.0277591	0.0115602	0.101115	0.334324	0.0115542	0.0211223	0	0.0718204	0.0241234	0
TCGA-FD-A43S	low risk	0.109029	0.0672137	0.15269	0.258196	0	0	0.0319492	0.0436665	0.0735902	0	0	0.0147075	0.0146259	0.0242212	0.012746	0.142039	0	0.00784455	0.0465217	0	0	0.000959826
TCGA-4Z-AA86	low risk	0.0205908	0	0.0036186	0.113889	0	0.186925	0.10995	0.0396133	0	0	0.0778328	0	0	0.203134	0.0780664	0.117088	0.00321486	0	0	0.0460773	0	0
TCGA-CF-A47W	low risk	0	0.0396775	0.0289726	0.16736	0	0.0942204	0	0	0	0	0.0336101	0.0841941	0.0402745	0	0.00968785	0.314048	0.00582022	0.114368	0.0677665	0	0	0
TCGA-CF-A47T	low risk	0.0624253	0.0399587	0	0.150974	0	0.118071	0	0.117543	0.00480942	0	0.00173836	0.0175435	0.0692566	0	0	0.08705	0.18905	0.121232	0	0.0136058	0	0.00674159
TCGA-GU-A42Q	low risk	0	0.0259285	0.00626277	0.0760828	0	0.1135	0	0.0175993	0	0	0.068658	0	0	0.543673	0.0488343	0	0.0865845	0	0	0.00756073	0.00531623	0
TCGA-E7-A677	low risk	0	0.0390581	0.000233676	0.171231	0	0	0.00136557	0.0364831	0.180771	0	0	0	0.0100792	0.0699756	0.0417671	0.00444997	0.176121	0.139335	0.0997835	0.0293455	0	0
TCGA-4Z-AA7M	low risk	0.0595901	0	0.0178445	0.0928207	0.100882	0	0	0	0.0249282	0	0.0721427	0	0	0.384477	0.0756224	0.141011	0.0196759	0	0	0.0110049	0	0
TCGA-E5-A4U1	low risk	0.0765597	0	0	0.0912545	0	0.229847	0	0.0321999	0.000458299	0	0.170428	0	0.0166201	0.0526109	0	0	0.128771	0.0427465	0.158504	0	0	0
TCGA-YC-A89H	low risk	0.139061	0	0.102861	0.081678	0	0	0.057489	0.0104384	0.00308316	0	0.00576308	0.0307836	0	0.313929	0.0641191	0.166927	0.0200946	0	0	0.00249945	0	0.00127321
TCGA-DK-A1AC	low risk	0.088269	0	0.0817832	0.185239	0	0.142587	0.0802667	0.0594022	0.0288372	0	0	0	0.0109692	0.104255	0.0528792	0.104266	0.00663764	0	0	0.0352677	0.0193418	0
TCGA-BT-A20O	low risk	0.029689	0	0.00637969	0.34755	0	0.113951	0.113721	0.0425697	0	0	0	0.00757269	0.00818225	0	0.0828382	0.157997	0.0103839	0	0.0729515	0	0	0.00621476
TCGA-5N-A9KM	low risk	0.033432	0	0.0513095	0.30235	0	0.145595	0.0529979	0.00252878	0	0	0	0.0301223	0.0838914	0	0.0446476	0.185789	0.00886174	0.00462004	0.0538539	0	0	0
TCGA-DK-AA74	low risk	0.0207361	0	0.00374606	0.134736	0	0.0485262	0.0349903	0.0697628	0.0257271	0	0	0.0325518	0	0.110957	0.152134	0.228569	0.0593994	0	0.0587878	0	0	0.0193757
TCGA-UY-A78P	low risk	0.0107902	0.00314764	0.00285217	0.11901	0	0.0775629	0.0661708	0.0718619	0	0	0.0169459	0	0	0.30319	0.0992754	0.128844	0.0263159	0	0.0592368	0	0	0.0147963
TCGA-S5-AA26	low risk	0	0.0861058	0.00260698	0.000467039	0	0.171272	0	0.0654461	0.00280186	0	0	0.119406	0	0.0170735	0	0.348375	0.0792964	0.0341156	0.0502789	0	0.0227546	0
TCGA-DK-AA6P	low risk	0.0882518	0	0.00212589	0.124467	0	0.147294	0	0.020748	0.0582565	0	0.00935026	0.0523279	0.0116769	0.165384	0.0174331	0.063131	0.0221207	0.0588672	0.158566	0	0	0
TCGA-XF-AAMG	low risk	0	0.125346	0	0.0279668	0	0.281185	0	0	0.021478	0	0.0267139	0	0.0637448	0.0185426	0.0304953	0.292508	0.00941315	0.0297863	0	0.0555039	0.0115306	0.00578608
TCGA-GV-A6ZA	low risk	0.0649637	0	0.0445403	0.179909	0	0.115651	0.016057	0.158772	0.0323303	0	0.0539817	0.010364	0.0085428	0.0685944	0.0818285	0.0367063	0.0445712	0.0365336	0.0466532	0	0	0
TCGA-CF-A27C	low risk	0	0.010165	0.0183466	0.225673	0	0.261926	0	0.0816079	0.010336	0.109844	0	0	0.00566016	0	0.00100534	0.0300176	0.1573	0.0587931	0.0112011	0	0	0.0181244
TCGA-ZF-A9RD	low risk	0.0738609	0	0.0037049	0.176581	0	0.0466808	0.136178	0.0373439	0.0237496	0	0.0166552	0.0131293	0.0043694	0.0658996	0.15085	0.102613	0.0612642	0	0.0839367	0	0	0.00318256
TCGA-FD-A6TG	low risk	0.0815976	0	0.105319	0.128149	0	0	0	0.084277	0.0104801	0.000468771	0	0.0502124	0.015507	0.0668044	0.0919002	0.167764	0.0634717	0	0.134049	0	0	0
TCGA-XF-A9SK	low risk	0.0112319	0	0.0434921	0.0474198	0	0.205591	0	0.0193135	0.0789304	0	0	0.0366007	0.0664028	0.00135779	0.0794468	0.231715	0.0280716	0.0837419	0.06522	0	0	0.00146448
TCGA-FD-A6TE	low risk	0.0443587	0	0.0953683	0.135322	0	0.182015	0.0731862	0.139592	0	0	0	0.0314557	0.00367684	0.035559	0.133078	0.0398178	0.0137719	0.0325313	0.0402673	0	0	0
TCGA-DK-A6B5	low risk	0.000362871	0.00456786	0.0159643	0.115643	0	0.0379503	0.00452962	0.152013	0.0037151	0	0	0	0.013833	0.146199	0.0749937	0.10216	0.146368	0.0562612	0.118727	0	0.0051591	0.00155256
TCGA-UY-A9PA	low risk	0	0	0.00110139	0.293685	0	0.103416	0.195641	0.0596139	0	0	0.0263451	0.00337997	0.00412369	0.0384219	0.086261	0.0563059	0.0544938	0.0462939	0.0309167	0	0	0
TCGA-FD-A62O	low risk	0.132545	0	0.108443	0.075527	0	0.0507112	0	0.0118361	0.0206678	0.00169716	0	0	0.0130409	0.138354	0	0.116941	0	0.140096	0	0.115889	0	0.0742514
TCGA-XF-AAMZ	low risk	0.398038	0	0.0237716	0.0623591	0	0.162213	0.0127247	0	0.115155	0	0	0	0.0236711	0.0221921	0.0334634	0.128674	0	0.00224161	0	0.00633612	0	0.0091601
TCGA-DK-A1AB	low risk	0.0162563	0	0.0283666	0.0513073	0	0.161324	0.0465907	0.0260827	0.0238695	0	0.00773503	0	0	0.164855	0.150673	0.111098	0.0307605	0.0567727	0.114436	0	0	0.00987296
TCGA-GV-A3QI	low risk	0.0201264	0	0	0	0	0.397137	0	0	0	0	0.043565	0	0.00253713	0.173678	0.00128546	0.173286	0.00789619	0.0519416	0.128548	0	0	0
TCGA-FD-A43Y	low risk	0	0.00108459	0.00273494	0.0915271	0	0.0898721	0.032353	0.0576016	0.00648338	0	0.0149351	0.0435904	0.0164847	0.173613	0.153629	0.115132	0.11551	0.014996	0.0704537	0	0	0
TCGA-ZF-AA5N	low risk	0.181312	0	0.0560754	0.00158665	0	0.0270135	0.191889	0.00777056	0.0119924	0	0	0.0465915	0	0.131083	0.0332555	0.089766	0	0.184992	0.0105278	0.00728606	0	0.0188575
TCGA-GC-A3RD	low risk	0	0.0209405	0	0.0279112	0	0.0499238	0	0.0189324	0.00815106	0	0.0764656	0	0	0.436144	0.00214136	0.101167	0	0	0	0.225116	0.0241267	0.00897997
TCGA-YC-A9TC	low risk	0.0549123	0	0.0059541	0.159959	0	0.0614425	0	0.0456126	0.0222676	0	0	0.160292	0	0.195274	0.0185091	0.152361	0	0.00482867	0	0.118587	0	0
TCGA-ZF-AA5H	low risk	0.0340101	0	0	0.0988006	0	0.166678	0.0645376	0.0161707	0	0	0.0412888	0.0408881	0	0.258405	0.113322	0.141502	0.00269813	0.00214109	0.0184126	0	0	0.00114436
TCGA-ZF-A9RF	low risk	0.050228	0	0.017738	0.403606	0	0.0436256	0.0793024	0.0419782	0.00376899	0	0	0.0213286	0.0103881	0.023062	0.0724033	0.213337	0	0	0	0.019233	0	0
TCGA-CF-A3MI	low risk	0	0.0484784	0.00300915	0.186771	0.0301825	0.0391564	0.0846588	0	0.00609353	0	0	0.0394631	0.0102939	0.154633	0.00534044	0.212976	0.024522	0.0800063	0.0744152	0	0	0
TCGA-FD-A5C0	low risk	0.1384	0	0.00253608	0.185945	0	0.175357	0	0	0	0	0	0	0.0459584	0.115725	0.0414093	0.167833	0	0.00882129	0.0462094	0.0489851	0	0.0228192
TCGA-G2-A2EJ	low risk	0.00698968	0	0.00267463	0.119052	0	0	0.17197	0.053661	0	0	0.012936	0.0272258	0	0.237133	0.111638	0.0781452	0	0.135194	0	0.0400508	0	0.00332984
TCGA-GD-A3OQ	low risk	0.0582387	0	0.00714241	0.0643195	0	0.0580845	0.058697	0.0973809	0	0	0	0.0411448	0.00554286	0.12476	0.0643346	0.115709	0.0295895	0.131835	0	0.08972	0.0294285	0.0240726
TCGA-K4-A6FZ	low risk	0.0494302	0	0.00507112	0.119638	0	0.17634	0	0.0232975	0.00405462	0	0	0	0.00474079	0.217965	0.0728159	0.0831558	0	0.0718985	0	0.124514	0	0.0470793
TCGA-DK-AA6R	low risk	0	0.00438364	0	0	0	0.0779645	0.0816314	0.133259	0.00976685	0	0.124641	0.0256101	0.00286219	0.0972664	0.150143	0.0137094	0.0830564	0.168628	0.0270782	0	0	0
TCGA-DK-AA77	low risk	0.00910617	0	0.00841732	0.27609	0	0.0705398	0.133793	0.0990017	0	0	0	0	0.00750615	0	0.0648837	0.0893527	0.0486627	0.146803	0.0418082	0	0	0.00403613
TCGA-FD-A6TB	low risk	0.291604	0	0.0556299	0.135741	0	0.047436	0.0927915	0	0.0198213	0	0	0.0528266	0	0.078751	0.0780826	0.0907522	0	0	0.0532755	0	0	0.00328758
TCGA-FD-A3B8	low risk	0.0770829	0	0	0.123635	0	0.196511	0.0640298	0	0	0	0.0586689	0	0	0.0977363	0.158307	0.0973804	0.0324488	0	0.0757568	0	0	0.0184423
TCGA-YF-AA3L	low risk	0	0.0939804	0	0.0185791	0	0.171118	0	0.0200913	0.096573	0	0.0391917	0	0.0274991	0	0.0257357	0.211179	0.266832	0	0.0292208	0	0	0
TCGA-BT-A20V	low risk	0	0.0223566	0	0.143813	0	0.109685	0.0852504	0.0677139	0.022332	0	0	0.074865	0.0632268	0.0614311	0.116034	0.0389835	0.112299	0.0500004	0.0318927	0	0.000116923	0
TCGA-ZF-AA4W	low risk	0	0.0785203	0.00412673	0.0504948	0	0.0747981	0	0.00743162	0	0	0	0.227165	0.00258576	0.196597	0.110611	0	0	0.0537614	0.167963	0	0.025945	0
TCGA-K4-A3WV	low risk	0.0159446	0	0	0.0218391	0	0.0748189	0	0.0796252	0	0	0	0.0495861	0.0348572	0.37339	0.00771828	0	0	0.109528	0	0.172538	0.0601544	0
TCGA-G2-A3VY	low risk	0.120385	0	0.0602167	0.303963	0	0	0	0.00063868	0	0	0.0771463	0	0.0242679	0	0	0.0992892	0.0775442	0.174534	0	0.062015	0	0
TCGA-E7-A7PW	low risk	0	0.201338	0.00907375	0.278214	0	0.0536398	0	0.0522575	0.028057	0	0	0.0513571	0.0403043	0.131028	0.0409673	0.0216863	0.027165	0.0506275	0	0.0086277	0.00565687	0
TCGA-S5-A6DX	low risk	0.159453	0	0.162568	0.161103	0	0	0.100666	0.00727385	0.0251886	0	0.00210312	0.0112073	0.0103509	0.0586738	0.117012	0.0804353	0.0331507	0	0.0668187	0	0	0.00399539
TCGA-DK-AA6W	low risk	0.0085408	0.00202595	0	0.0497879	0	0.121051	0.00242972	0	0.0409747	0	0	0.0240108	0	0.146525	0.0795436	0.134665	0.377794	0	0	0	0.0126522	0
TCGA-DK-A3X2	low risk	0	0.0402416	0	0.200793	0	0.0497294	0	0.0667282	0	0	0	0.000993479	0.0212326	0.215937	0	0.147384	0	0.20501	0.042626	0	0	0.00932459
TCGA-BT-A20J	low risk	0.0358693	0	0	0.139979	0	0.24379	0.0466299	0.0147331	0	0	0	0.0491922	0.0150903	0.108292	0.147631	0.130248	0.0199351	0.00150292	0.0440768	0	0	0.00303061
TCGA-K4-A5RH	low risk	0.00333714	0	0.000589079	0.452572	0	0	0.18587	0.0212483	0.00448448	0	0.00790172	0	0.0194567	0	0.0844079	0.209806	0	0	0.0103271	0	0	0
TCGA-2F-A9KQ	low risk	0	0	0	0.0895072	0	0.189424	0	0.02335	0	0	0	0.0319794	0.100754	0.0237457	0	0.135189	0.0636218	0.198763	0.142687	0	0	0.000978628
TCGA-XF-AAMQ	low risk	0.113333	0	0.122871	0.182019	0	0.0905684	0.0821919	0.0871981	0.00680241	0	0	0.010281	0.00320236	0	0.0713701	0.073845	0.0658337	0.0505539	0.0370233	0	0.00290677	0
TCGA-G2-AA3D	low risk	0.193651	0.0742745	0.0447258	0.177122	0	0.0151077	0.0169354	0.0412684	0.112871	0	0	0.0300508	0.0107473	0.0108631	0	0.0951321	0	0.132871	0.0403523	0	0	0.00402689
TCGA-GD-A2C5	low risk	0	0.0115282	0.0170182	0.00759714	0	0.192588	0	0	0.0331159	0	0.0113729	0.0128516	0.0173224	0.0674553	0.0255279	0.171912	0.116663	0.125718	0.125004	0	0.043779	0.0205464
TCGA-CF-A3MH	low risk	0	0.117817	0.0190341	0.0825384	0.143491	0	0	0.036355	0	0.0559151	0	0	0.0028477	0	0.0100402	0.131845	0.181766	0.135737	0	0.0689534	0	0.0136598
TCGA-K4-AAQO	low risk	0.241842	0	0.0706385	0.0933129	0	0.0523827	0.00948154	0.0218928	0.0365945	0	0	0.0438942	0.0148056	0.026055	0.0590121	0.160743	0.0281942	0.013228	0.127923	0	0	0
TCGA-ZF-AA4U	high risk	0	0.00270578	0	0.132399	0	0.0467596	0.0467215	0.128128	0.0287828	0.00473303	0	0.00208294	0.0536497	0	0.162911	0.128219	0.176392	0.0152634	0.0623081	0	0.00894466	0
TCGA-XF-A9SX	high risk	0.0390184	0	0.0071459	0.099401	0	0.188546	0.0989602	0.026287	0.0671858	0	0	0.0222239	0	0.0496185	0.0591444	0.235645	0.00736993	0.0450596	0.0524356	0	0	0.00195854
TCGA-DK-A3IQ	high risk	0.0461263	0	0.00504782	0.0173783	0	0.313013	0	0	0	0	0.0150674	0.00872428	0.022415	0.154074	0	0.276813	0	0.0139798	0.127361	0	0	0
TCGA-FD-A3SO	high risk	0.0114694	0	0	0.0672335	0	0.156302	0.0585957	0.0410602	0.0158897	0	0.0163852	0.0155131	0.0688407	0.151859	0.163412	0.15039	0.0103511	0	0.0589952	0	0	0.0137035
TCGA-G2-AA3F	high risk	0	0.144868	0.0154466	0.276247	0	0	0.00834223	0	0	0	0	0.113802	0.0129501	0.0461269	0.0323239	0.218634	0	0.108628	0.0175637	0	0	0.00506797
TCGA-G2-A2EF	high risk	0.028538	0	0.00945052	0.177077	0	0.048924	0.270208	0.0138024	0	0	0.0588696	0	0.0029689	0.0582599	0.127799	0.136957	0.0619728	0	0.00517329	0	0	0
TCGA-UY-A78L	high risk	0	0.00215091	0.0113361	0.0471635	0	0.132636	0	0.0453329	0.00931782	0	0	0.0301392	0	0.298084	0.0406345	0.189612	0.0355341	0.0444055	0.011931	0	0	0.101723
TCGA-ZF-A9R1	high risk	0.173539	0.0655235	0	0.126131	0	0.159842	0	0.030853	0.012831	0	0	0.0465673	0.0190937	0.0989768	0.0525197	0.045841	0	0	0.168282	0	0	0
TCGA-4Z-AA83	high risk	0	0.00398223	0	0.0432978	0	0.0914728	0	0.00415917	0.0867739	0	0	0.0702856	0	0.218192	0.0475074	0.0903533	0.0765104	0.171418	0	0.043282	0	0.0527649
TCGA-FD-A43U	high risk	0.017838	0.0233277	0.00846714	0.093045	0	0.0780657	0.0194733	0.00722548	0.0546766	0	0	0.0278168	0.0264758	0.450455	0.0211551	0.122125	0.00731671	0	0.0425371	0	0	0
TCGA-KQ-A41S	high risk	0.0445974	0	0	0.0780428	0	0.208632	0.0027252	0.0259028	0	0	0	0.0539206	0.0454671	0.0437329	0.031017	0.30379	0.0119603	0.0327221	0.0909275	0	0.0102719	0.0162904
TCGA-DK-A3WY	high risk	0.333372	0.125799	0.0728586	0.0933691	0	0.080014	0.0291705	0.0708531	0.0421863	0	0.00155803	0	0	0.0648361	0.0431109	0.0273314	0	0	0.015541	0	0	0
TCGA-DK-A3IV	high risk	0.0892007	0.0168762	0	0.0742063	0	0.253531	0	0.0769519	0.0917173	0	0	0.0518405	0	0.0641985	0.118978	0.0533811	0.0176981	0.0609181	0.0305028	0	0	0
TCGA-K4-A54R	high risk	0	0	0.00492057	0.231516	0	0.0665898	0.134457	0.012895	0	0	0.12774	5.28e-05	0	0.0773812	0.167542	0.115602	0.00462104	0.00795636	0.0487263	0	0	0
TCGA-XF-AAN3	high risk	0	0.0266812	0.00175587	0.0351644	0	0.187014	0.00738297	0.039573	0.0500219	0	0.00153939	0.000352034	0.00893513	0	0.018857	0.195054	0.227342	0.080152	0.101961	0	0	0.0182138
TCGA-XF-A9ST	high risk	0.100723	0	0.0189458	0.00241045	0.0460521	0.0425118	0	0	0.16255	0	0.147032	0	0.03749	0.388073	0	0	0	0.0509822	0	0.00323018	0	0
TCGA-E7-A7XN	high risk	0	0	0.00245767	0.385012	0	0	0.183986	0.0391957	0.026664	0	0.0612516	0	0.0096651	0	0.14567	0.0618203	0.0585497	0.0122243	0.0135036	0	0	0
TCGA-CF-A8HY	high risk	0	0.0767757	0.0105278	0.134268	0.0379853	0.110942	0	0	0	0	0.0857115	0	0.029815	0	0	0.0142873	0.327288	0.126068	0.00986942	0.0364621	0	0
TCGA-GC-A3BM	high risk	0.00234927	0.0325152	0	0.160282	0	0.178833	0.00716292	0.174997	0	0	0	0.0130095	0.0115406	0	0.215626	0.0613061	0.120613	0.00682089	0.014944	0	0	0
TCGA-PQ-A6FN	high risk	0.12086	0	0.153857	0.154514	0	0	0.0491542	0.025106	0.0147505	0	0	0.00195286	0	0.267149	0.0882168	0.0668557	0.0387791	0	0.0183194	0	0	0.00048533
TCGA-MV-A51V	high risk	0.115186	0	0.0360935	0	0	0.370434	0	0.11313	0	0	0	0.0364087	0.00706492	0	0.0531006	0.114975	0	0.0634552	0	0.090152	0	0
TCGA-GU-A762	high risk	0.0316729	0	0.00772516	0.25296	0	0.0140532	0.216195	0.0279724	0.0301297	0	0.0569404	0	0.0103695	0.0111205	0.122828	0.160522	0.0235237	0.00582172	0.0281658	0	0	0
TCGA-CF-A9FF	high risk	0.403397	0	0.0485825	0.104804	0	0.0585945	0.00236682	0.0610892	0.0675115	0	0	0.0325114	0.00131551	0.0472555	0.0362505	0.0359466	0	0.0384459	0.0619291	0	0	0
TCGA-ZF-AA4T	high risk	0.0338512	0.00207488	0.00965655	0.0640973	0.0011606	0	0	0.0467114	0.0545465	0	0.0538221	0	0	0.262471	0.0100967	0.0063204	0	0.241407	0	0.202438	0	0.0113465
TCGA-ZF-A9RE	high risk	0	0.0819765	0	0.0954548	0	0.0896432	0	0.0780719	0	0.00630217	0	0.0254392	0.0220289	0.0871125	0	0.0252708	0	0.234919	0	0.116028	0	0.137753
TCGA-DK-AA6X	high risk	0.0382618	0.0388719	0	0.0786254	0	0.128636	0.00942096	0.0105726	0.0645708	0	0	0.0144524	0.0137902	0.101782	0.0623943	0.0840857	0.196739	0.00428087	0.145286	0	0	0.00822922
TCGA-BT-A20W	high risk	0.106322	0	0.0125424	0.163613	0	0.122658	0	0.0457756	0.16722	0	0	0.0597994	0.000536647	0.0324709	0.0647949	0.0569875	0.0930394	0.0441903	0.0300498	0	0	0
TCGA-HQ-A5NE	high risk	0.00803605	0	0.00339393	0.0463531	0	0.105795	0.0188938	0.0818118	0	0	0.083701	0	0	0.239682	0.0066722	0.0337243	0	0.19233	0	0.179606	0	0
TCGA-E5-A2PC	high risk	0	0	0.00600152	0.175855	0	0.0470968	0.167215	0.137726	0.0106842	0	0	0.0498939	0.0508289	0.0386345	0.135673	0.0607667	0.0677482	0.000132535	0.0517434	0	0	0
TCGA-DK-A1AE	high risk	0	1.44e-05	0.00821661	0.0573789	0	0.23736	0.0898872	0.124587	0	0	0.0567108	0.0607907	0.00758912	0.0495126	0.0739008	0.032438	0.111287	0.0186555	0.071671	0	0	0
TCGA-SY-A9G5	high risk	0.0270311	0	0.036839	0.166195	0	0.0504969	0.046842	0.12215	0	0.0526169	0	0.0335448	0	0.0499647	0	0.174389	0	0.176996	0.0629353	0	0	0
TCGA-ZF-AA4N	high risk	0	0.00214706	0.00371941	0.152831	0	0.141396	0.11341	0.0225919	0.00140446	0	0.00590232	0.00759026	0.121695	0	0.114091	0.10704	0.160265	0	0	0.0373791	0.00853683	0
TCGA-HQ-A2OE	high risk	0.0750204	0	0.0504794	0.111781	0	0.0512456	0.0741084	0.0618433	0.0394496	0.00458661	0.0121878	0	0	0.014107	0.0547106	0.0788628	0.201371	0.0699488	0.0633286	0	0	0.0369691
TCGA-XF-A8HE	high risk	0.0538713	0	0.02255	0.228992	0	0.0777262	0.0974099	0.0586499	0.0172168	0	0.0529285	0	0	0.054806	0.120049	0.0764718	0	0.0193928	0.0297332	0	0	0.0902022
TCGA-FD-A5BR	high risk	0.163514	0	0.128903	0.0845337	0	0.128461	0.0839937	0.0562979	0.0720756	0	0	0	0	0.101835	0.00446582	0.0933584	0.00744939	0.0275946	0.0398493	0	0	0.00766905
TCGA-FD-A3B3	high risk	0.0526212	0	0.117529	0.140705	0	0.111297	0.0735917	0.0663334	0	0	0.0159296	0.023144	0	0.116561	0.128519	0.0907707	0.00992763	0.00343812	0.0442181	0	0	0.00541473
TCGA-XF-A8HC	high risk	0	0.0679146	0	0.0931607	0	0.229609	0	0.0419194	0	0.0649498	0	0	0	0.205527	0	0.04824	0	0.0191433	0.210645	0	0	0.0188913
TCGA-ZF-A9RN	high risk	0.00129841	0	0	0.379212	0	0.117246	0.147583	0.0559307	0.0253692	0	0.00229393	0.0104276	0.0111815	0.0519816	0.106047	0.0607981	0	0	0.0306301	0	0	0
TCGA-FD-A6TC	high risk	0	0.014877	0.0343429	0.00452003	0	0.103996	0	0	0.0030198	0	0.0112953	0	0	0.454501	0.00145718	0.226113	0	0.039261	0	0.0980552	0	0.00856223
TCGA-XF-A8HD	high risk	0.200579	0	0.0491014	0.213474	0	0	0.0915482	0.0552201	0.0017559	0	0.00376243	0.0776948	0	0.0068021	0.0263994	0.0649207	0	0.136022	0.0683829	0	0	0.00433614
TCGA-ZF-AA54	high risk	0.00491805	0.00105762	0.000156898	0.0775305	0	0.0862137	0.0119499	0.0234575	0.0124116	0	0.00440827	0.0113486	0	0.213198	0.0444908	0.474993	0.00339875	0	0.0304666	0	0	0
TCGA-ZF-AA4V	high risk	0.00300646	0	0.0157888	0.265894	0	0.0328677	0.148168	0.0493183	0.0101448	0.0241969	0.00792194	0.0451901	0	0.121109	0.0921101	0.0921615	0.0315617	0.00591206	0.0546475	0	0	0
TCGA-E7-A7DV	high risk	0	0.00271261	0	0.0268475	0	0.131366	0.0230402	0	0	0	0.0222389	0.00386407	0.0885227	0.21297	0.0849558	0.399181	0	0	0	0.00430083	0	0
TCGA-DK-AA76	high risk	0	0.0789743	0	0.0214	0	0.278775	0	0	0.102524	0	0	0.0360636	0.0142315	0.177792	0	0.142035	0	0.0797096	0	0.0684956	0	0
TCGA-XF-A9T0	high risk	0.0270839	0	0.207768	0.145335	0	0.0239414	0.076488	0.0170799	0.022884	0	0.00396813	0.0118896	0.00422466	0.201376	0.086835	0.124093	0.0223916	0	0.0210622	0	0.000334471	0.00324478
TCGA-ZF-AA4X	high risk	0.0536721	0.057171	0	0.0683775	0	0.0199553	0.000407263	0.0518963	0	0	0.093556	0	0.0137061	0.121959	0	0.0821669	0	0.394012	0.0412211	0	0.00189919	0
TCGA-DK-A6B1	high risk	0	0	0.00116446	0.11123	0	0.238272	0	0.00268737	0.0307719	0	0	0	0.0984317	0.0975947	0	0.0860333	0.0132443	0.176042	0.135131	0	0.00939675	0
TCGA-ZF-A9RC	high risk	0.0647888	0	0.0179233	0.0590074	0.00862493	0	0.0693756	5.96e-06	0	0	0.04577	0	0	0.304885	0.0496183	0.166758	0	0.0190214	0.162996	0	0	0.031225
TCGA-BT-A0YX	high risk	0.0262795	0	0.00241909	0.19818	0	0.194301	0.0933382	0.0666721	0	0	0	0.0437765	0.020183	0.0171543	0.0683702	0.110132	0.0344343	0.0357268	0.0666261	0	0	0.0224067
TCGA-K4-A83P	high risk	0.177914	0.0743287	0.0920775	0.128617	0	0.0888095	0.0493365	0.0533207	0.0325822	0	0	0.035378	0.00369902	0.103475	0.0607943	0.0674122	0.0187947	0	0.00847948	0	0	0.00498152
TCGA-E7-A5KE	high risk	0.0241068	0	0	0.031767	0.114849	0	0	0	0.0407268	0	0.351487	0	0.0385186	0.0405896	0	0.0390059	0	0.18584	0	0.120969	0	0.0121397
TCGA-C4-A0F6	high risk	0	0.00918036	0.0577265	0.140359	0	0.0240194	0.0903787	0.0617093	0	0	0.0101663	0	0	0.317455	0.0875482	0.153906	0.0025353	0.00345582	0.0358482	0	0.0047894	0.000923171
TCGA-E7-A5KF	high risk	0	0.0459958	0.014047	0.0790252	0.00157247	0.248309	0	0.0053389	0.0495604	0	0.0492384	0	0.00758116	0.0244391	0	0.144997	0	0.245143	0	0.0560737	0.0113183	0.0173609
TCGA-BT-A42F	high risk	0.126188	0	0.0611295	0.134775	0	0.0423539	0.0762929	0.0501449	0.0173548	0	0.0131184	0.0173275	0	0.215254	0.0475695	0.0999484	0.00016748	0.00224345	0	0.0961324	0	0
TCGA-UY-A9PB	high risk	0.0180271	0	0.0651059	0.155497	0	0.141585	0.0987093	0.039022	0.0232018	0	0.0248544	0.00169388	0	0.148369	0.100191	0.134625	0.0072088	0	0.04191	0	0	0
TCGA-FD-A3NA	high risk	0.000907759	0	0.0014185	0.222558	0	0	0.194184	0.00112309	0	0	0.0332119	0.0177519	0.0131611	0.0886866	0.0760177	0.138667	0.083132	0.0326669	0.0818083	0	0	0.0147059
TCGA-K4-A3WS	high risk	0.202897	0	0.0658463	0.112883	0	0.0122716	0.0510287	0.0134219	0.0791891	0	0.00708262	0.00843445	0.0111319	0.0487238	0.178688	0.106842	0.0326002	0.0140898	0.0548699	0	0	0
TCGA-UY-A78N	high risk	0.000192889	0.0318574	0.00494905	0.0809166	0	0.169686	0	0.0572837	0	0	0	0.0974898	0.0149957	0	0.0138057	0.159395	0.112962	0.104293	0.152173	0	0	0
TCGA-UY-A78K	high risk	0.0898879	0.0886024	0.114516	0.16053	0	0.0863939	0.0464838	0.0395813	0.0824629	0	0.0217074	0	0.000955814	0.0827599	0.0565023	0.103906	0.015047	0	0.0106628	0	0	0
TCGA-XF-AAMJ	high risk	0.171949	0	0.133454	0.0676596	0	0.00626062	0.050189	0.0295647	0.0181015	0	0.00151644	0.0282663	0	0.219558	0.0857233	0.0832138	0.0045451	0	0.0924178	0	0	0.00758133
TCGA-4Z-AA7Q	high risk	0.0154007	0	0.0160846	0.275874	0	0.076573	0.112243	0.065357	0.0301727	0	0	0.00622129	0.0063775	0.0513147	0.167943	0.0951231	0	0.0341618	0.0471532	0	0	0
TCGA-BT-A2LA	high risk	0.205895	0	0	0.159304	0	0.00478781	0	0.132931	0	0	0	0.0556786	0.0215891	0.277402	0	0.0410437	0	0.00309957	0	0.0939091	0.00435985	0
TCGA-K4-A5RI	high risk	0	0.00888559	0.000458869	0.0137413	0	0.09157	0	0.0457097	0.0241632	0	0.0728806	0.0886135	0.0553107	0.00156683	0.00245338	0.113675	0.241584	0.0587298	0.180633	0	2.44e-05	0
TCGA-ZF-AA4R	high risk	0	0.00563159	0.0142068	0.0886134	0	0.0444971	0	0.077225	0.023111	0	0	0.0475306	0	0.434901	0.130841	0.0259937	0	0.0664832	0.0409657	0	0	0
TCGA-G2-A2EL	high risk	0	0.0322136	0	0.150013	0	0	0.0839833	0.103852	0	0	0	0.0968727	0	0.240177	0.14199	0.00131012	0.0865132	0	0.0630745	0	0	0
TCGA-DK-A3WX	high risk	0.0277388	0	0.0153747	0.0827099	0	0.223078	0.0330915	0.0471329	0	0	0.0438196	0.0116448	0	0.133989	0.117966	0.0476948	0.00442145	0	0	0.0581185	0	0.15322
TCGA-4Z-AA82	high risk	0	0.0520129	0.00512983	0	0	0.170951	0	0.0530523	0.00108902	0	0	0.0746065	0.0155556	0.0302906	0	0.0346488	0.251928	0.22659	0.0806549	0	0	0.0034906
TCGA-2F-A9KO	high risk	0.0890234	0	0.0290671	0.180249	0	0.196608	0.10159	0.0637699	0.00332051	0	0	0.0343771	0.0237699	0.0239409	0.0735775	0.0866433	0.0284299	0.0168525	0.0487814	0	0	0
TCGA-DK-A3IS	high risk	0	0.00276057	0	0.294018	0	0.0523975	0.0939681	0.151096	0.000129757	0	0	0.0501059	0.0180906	0	0.073001	0.0768148	0.0808256	0.0317843	0.0735188	0	0	0.00148903
TCGA-CF-A1HS	high risk	0	0.0543148	0	0.0743759	0	0.152384	0.00311907	0.0381391	0	0	0	0	0.00171876	0.146227	0.0316743	0.162755	0.203967	0.0497393	0	0.0784505	0	0.0031349
TCGA-K4-A6MB	high risk	0	0	0	0.0249772	0	0.0808917	0	0.0278252	0.0181309	0	0.0150829	0	0	0.520614	0.0169818	0.155524	0.00257559	0.0590592	0.0742485	0	0.00062197	0.00346695
TCGA-FD-A62P	high risk	0.0149081	0.00204888	0	0.186038	0	0	0.130023	0.0206609	0.00526693	0	0.0269135	0	0	0.337769	0.0643817	0.152043	0.0102242	0	0.0378862	0	0	0.0118356
TCGA-XF-A9SY	high risk	0.0244089	0	0.00497129	0.101477	0	0.128392	0.119676	0.00364182	0	0	0.0358094	0	0	0.19961	0.138178	0.118611	0.00705183	0	0	0.118174	0	0
TCGA-DK-AA6S	high risk	0	0.00184938	0.00264297	0.147963	0	0.181512	0.0844145	0.0753296	0.0311894	0	0	0.00639302	0	0.108223	0.168219	0.120219	0.0355723	0	0.0364385	0	0	3.43e-05
TCGA-FD-A3SP	high risk	0.0104772	0	0.00975772	0.0768988	0	0.235186	0.0376242	0.000187179	0.00373684	0	0.0138501	0	0	0.319389	0.0803387	0.133684	0.042744	0	0.0283428	0	0	0.00778321
TCGA-E7-A541	high risk	0	0.00634938	0.00592373	0.407108	0	0.00842096	0.116493	0.0374588	0.0332655	0	0	0.0241572	0.00706543	0.0164816	0.0563246	0.101205	0.10033	0.0139952	0.0447633	0	0.0142891	0.00636977
TCGA-XF-AAN1	high risk	0.00728819	0.0333231	0.000804387	0.171021	0	0.192363	0	0.0713456	0.0134206	0	0	0	0.0459948	0.0139489	0.0261729	0	0.142485	0.213382	0	0.068451	0	0
TCGA-CF-A3MF	high risk	0.0266378	0	0.0795955	0.336127	0	0	0.0778182	0.125482	0	0	0.00694676	0	0.0624744	0.0827727	0.00958055	0	0	0.0783172	0	0.0827558	0.0314925	0
TCGA-E7-A6MD	high risk	0.196879	0	0.0374718	0.0969812	0	0.25142	0.0124125	0.0333237	0.037622	0	0	0.00652868	0.0143611	0.0461203	0.0481064	0.113435	0.0425047	0.0143101	0.0485225	0	0	0
TCGA-4Z-AA84	high risk	0.146621	0	0.13726	0.0535139	0	0.0574094	0	0.0622139	0.011966	0	0.0130639	0.0143789	0	0.35382	0.0410407	0.079478	0	0.0143055	0	0.0134659	0	0.00146279
TCGA-5N-A9KI	high risk	0.0113774	0.0796208	0.0165468	0.0400712	0	0.11221	0	0.0474661	0.0235264	0	0	0.0251592	0	0.10603	0.0640408	0.252765	0.0122482	0.0839299	0.061036	0	0	0.0639711
TCGA-FD-A3B6	high risk	0.0155365	0	0.00614776	0.19591	0	0.106554	0.142762	0.0556441	0	0	0.0463643	0	0.00626049	0.137335	0.0777079	0.165623	0.0104036	0	0.0234907	0	0	0.0102601
TCGA-FD-A5BU	high risk	0.113879	0	0.11933	0.0520578	0	0.123421	0.026416	0.0387242	0.0131049	0	0.00872791	0.0238858	0.00832061	0.131658	0.102082	0.0598127	0.114932	0	0.0624256	0	0	0.00122247
TCGA-GC-A4ZW	high risk	0.100573	0	0.0816945	0.14998	0	0.0780837	0.095536	0.0733301	0	0	0	0.0547698	0	0.115316	0.0298683	0.105395	0.0301803	0.00993408	0.0753395	0	0	0
TCGA-H4-A2HO	high risk	0.0896207	0	0.0160475	0.164431	0	0.141143	0.0306397	0.00693657	0.0902405	0.00243291	0.0230927	0	0.00303403	0.231806	0.00858579	0.0688357	0.00509389	0.0970369	0	0.021023	0	0
TCGA-DK-A1A6	high risk	0	0	0.0010991	0.324579	0	0	0.128585	0.0702168	0.00458867	0	0.00653035	0	0.00741082	0	0	0.171072	0	0.224508	0	0.0491671	0	0.0122424
TCGA-E5-A4TZ	high risk	0.103072	0	0.0100275	0.0640462	0	0	0	0.115015	0.0200333	0	0.0196688	0	0	0.386872	0	0.0988422	0	0.132702	0.0409182	0	0	0.0088026
TCGA-YF-AA3M	high risk	0	0.0185916	0.028876	0.112757	0	0	0.0420972	0.0347375	0.0343626	0	0	0.0183004	0	0.144462	0	0.126209	0.057897	0.139188	0.19158	0	0.0195487	0.0313918
TCGA-BT-A2LB	high risk	0.0355744	0.0039914	0.0332567	0.146369	0	0.0172845	0.139455	0.0414587	0	0	0.0582636	0	0.00199114	0.0694162	0.124043	0.122483	0.019708	0.112953	0.0167105	0	0	0.057041
TCGA-DK-A6AW	high risk	0	0.0320378	0.017355	0.143127	0	0.142722	0.0418047	0.0344744	0.074171	0	0	0.138389	0.0228121	0.0659301	0	0.116657	0	0.103844	0.0666769	0	0	0
TCGA-GV-A3JW	high risk	0.0340349	0.0567391	0.0459103	0.0902096	0.0824707	0	0	0	0.0258083	0	0.0547618	0	0.0029555	0.147578	0	0.218245	0.0415678	0.0736186	0.1261	0	0	0
TCGA-DK-A3IM	high risk	0	0.00512436	0	0.0693488	0	0.100445	0	0.0890128	0	0	0	0	0	0.57822	0.0588208	0.027775	0	0.00286986	0	0.0503921	0	0.0179915
TCGA-GU-A764	high risk	0.00342535	0.0134654	0.0746737	0.0798085	0	0.0843485	0.124874	0.0362876	0	0	0	0.0791564	0.0522664	0.0860355	0.156091	0.120634	0.046988	0	0.0419456	0	0	0
TCGA-4Z-AA7N	high risk	0.28807	0.103525	0.0130459	0.0720852	0	0.13759	0.0334957	0.0843483	0.0723007	0	0	0	0	0.107108	0.0216049	0.0347054	0.00942609	0.00990931	0.0127845	0	0	0
TCGA-XF-AAML	high risk	0.101171	0	0.0340738	0.216279	0	0.060079	0.13017	0.0734291	0.00908571	0	0.0228946	0	0.0358661	0.0665246	0.0255438	0.0487305	0.00769238	0.0483777	0	0.0780688	0.0304201	0.0115942
TCGA-C4-A0F0	high risk	0	0	0	0.160236	0	0.117187	0.114933	0	0	0	0	0	0.00754511	0.116162	0.102996	0.160927	0.108791	0.034805	0.0549225	0.00141988	0	0.0200751
TCGA-GC-A3OO	high risk	0.00595871	0.0424842	0.00101427	0.0202219	0	0.0518142	0	0.0244949	0	0.00118692	0	0.0202059	0	0.379131	0.0317435	0.230941	0.0184238	0.00671593	0.145702	0	0.0199613	0
TCGA-GV-A3QF	high risk	0	0.11889	0	0	0.144198	0	0.010432	0	0	0	0.101462	0	0.062473	0.0886288	0	0	0	0.241133	0	0.0109258	0.00178053	0.220077
TCGA-DK-A3IU	high risk	0.127934	0	0.0286444	0.233703	0	0.128811	0.0743674	0.0323019	0.0236408	0	0	0.00692369	0	0.130842	0.106546	0.0556997	0.00708974	0	0.0301851	0	0	0.0133118
TCGA-SY-A9G0	high risk	0.352526	0	0.12192	0.048052	0	0.0861068	0	0.0119109	0.0142461	0	0	0.0445401	0	0.0412092	0.00922089	0.0919344	0.0197787	0.0202249	0.138331	0	0	0
TCGA-E7-A3X6	high risk	0	0	0.0143729	0.167891	0	0	0.12341	0.099967	0.0507132	0.0196839	0	0.0224651	0	0.043104	0.15766	0.097316	0.0975562	0.0277457	0.0715074	0	0	0.00660751
TCGA-E7-A8O8	high risk	0	0.0177904	0.0104414	0.110413	0	0.1348	0.0227671	0.0767704	0	0.00220279	0	0.131598	0	0.146376	0.0179734	0.100237	0.0678067	0.0596211	0.101203	0	0	0
TCGA-XF-AAME	high risk	0.136014	0	0.0640732	0.0610031	0	0.16373	0.0357707	0	0.0426265	0.0343544	0	0.00583413	0.00204847	0.113731	0.0188614	0.175681	0.0208322	0.0184453	0.084592	0	0.00351313	0.01889
TCGA-C4-A0EZ	high risk	0	0.0313468	0.0104522	0.114722	0	0.187514	0	0.0610613	0.0371243	0	0.11607	0	0.00502185	0.259427	0.00993076	0.126301	0.0189728	0.00926185	0.012794	0	0	0
TCGA-BL-A13I	high risk	0.00735388	0	0	0.0371778	0	0.174401	0.00918831	0.0442882	0.0305409	0	0	0.00838273	0.0314197	0.0303709	0.0238066	0.522399	0	0	0.0806708	0	0	0
TCGA-E7-A8O7	high risk	0.034356	0	0.071434	0.115043	0	0.00753577	0	0.0405371	0.114553	0.0110325	0	0	0.00495622	0.00912423	0.00721933	0.0768137	0.217146	0.117699	0	0.133146	0	0.0394036
TCGA-DK-AA71	high risk	0.0107722	0	0.00973148	0.228488	0	0	0.124255	0.066774	0	0	0	0.0446008	0.00687089	0.163792	0.112567	0.15351	0	0.008797	0.0676929	0	0.00214823	0
TCGA-H4-A2HQ	high risk	0	0.00442043	0.00686731	0.0854256	0	0.23767	0.019515	0.113779	0	0	0.0439677	0	0.0110554	0	0.161458	0.0995319	0.105314	0.109634	0.00136209	0	0	0
TCGA-E7-A4IJ	high risk	0.0119745	0	0.00152625	0.24454	0	0.106836	0.00172819	0.180257	0	0.138962	0.00662437	0.0457818	0	0.02348	0.0376873	0.0678756	0.0101854	0.0848474	0.0376944	0	0	0
TCGA-DK-A3IT	high risk	0.236027	0	0.210788	0.0619125	0	0.132263	0.00682331	0	0	0	0.00920392	0	0.0231725	0.0458409	0.038568	0.119347	0	0.0260485	0.0900062	0	0	0
TCGA-BT-A20P	high risk	0	0.0572104	0.0294712	0.150332	0	0.17111	0	0.02364	0	0	0	0.0796479	0.0111207	0.0923733	0	0.187149	0	0.196143	0	0.0018031	0	0
TCGA-BL-A0C8	high risk	0.00456183	0.00212794	0	0.0384577	0	0.168079	0	0	0	0	0.0490353	0.022185	0.0885665	0.0556114	0	0.394961	0	0.126479	0.0437851	0	0	0.00614975
TCGA-4Z-AA87	high risk	0	0.0511206	0.0142549	0.208395	0	0	0.114023	0.0343822	0.0427868	0	0.0308767	0	0.0154653	0.114786	0.0850286	0.079646	0.207968	0	0	0	0.00126717	0
TCGA-G2-A3IE	high risk	0	0.106101	0	0.113659	0	0.105588	0	0.0186938	0.0112812	0	0.0344586	0	0.0170751	0	0	0.292166	0	0.229032	0	0.0532954	0.0172051	0.00144446
TCGA-UY-A9PD	high risk	0.0729231	0	0.117247	0.0172632	0	0.00619095	0	0.0311342	0.0239579	0.000407859	0	0.0258354	0	0.482358	0.0726078	0.125499	0	0	0.0245758	0	0	0
TCGA-FD-A6TI	high risk	0.0789841	0	0.0179826	0.184372	0	0.221147	0.014158	0.0553683	0	0	0	0.0364786	0.0141458	0.0130702	0.0397461	0.145801	0.0163824	0.0416607	0.0665534	0.0525312	0	0.00161851
TCGA-BT-A20T	high risk	0	0.0219556	0.000536577	0.134967	0	0.20338	0.0909809	0.0659488	0.00593926	0.0140512	0	0.051661	0	0.0644249	0.076531	0.117871	0.0726652	0.026469	0.0526188	0	0	0
TCGA-GU-A767	high risk	0.0297244	0.0124663	0.0214037	0.0612222	0	0.161946	0	0.00639881	0.0108276	0	0	0.0789623	0.118012	0	0.00708564	0.142544	0	0.07219	0.277217	0	0	0
TCGA-E7-A4XJ	high risk	0	0.134789	0.0804612	0.0148606	0	0.0836795	0	0.0194229	0.0908701	0	0	0.0687593	0.0191038	0	0	0.149535	0.220656	0.0855351	0.00959572	0.022732	0	0
TCGA-4Z-AA80	high risk	0.143203	0	0.0810386	0.184717	0	0	0.0553467	0.08965	0.0304043	0	0.0432033	0.0112601	0	0.025235	0.109195	0.0952526	0.0183859	0.0803862	0.0232899	0	0	0.00943335
TCGA-BT-A20R	high risk	0.0603441	0	0.00671375	0.0530076	0	0.0430391	0.0146069	0.00250498	0	0	0	0.02485	0	0.59808	0.0220225	0.0915566	0	0.0316311	0.0516434	0	0	0
TCGA-CU-A72E	high risk	0	0.0195338	0	0.0320645	0	0.139294	0	0.0219985	0.00379386	0	0	0.0248219	0	0.430712	0.0302072	0.196434	0.0108546	0	0.0671322	0	0.0231535	0
TCGA-GV-A40E	high risk	0	0.00214339	0.00213303	0.147142	0	0.0728965	0.126925	0.0125788	0	0	0.0528469	0	0.00774668	0.157853	0	0.108679	0	0.206541	0	0.0780764	0	0.0244393
TCGA-XF-AAMY	high risk	0.117574	0	0.0143902	0.0257105	0	0.0256507	0.00159648	0	0.0034036	0.00465267	0.00216829	0	0.0140525	0.417492	0.0672678	0.213299	0	0	0.0050815	0.011777	0.0639276	0.0119564
TCGA-XF-AAMX	high risk	0	0.037727	0.0275663	0.0374501	0	0.078471	0.0514952	0.100791	0.0317812	0	0	0	0	0.152191	0.0813903	0.35409	0	0	0.0470475	0	0	0
TCGA-FJ-A3Z7	high risk	0.18305	0	0.0299351	0.206864	0	0.148387	0.04917	0.0354684	0	0	0.0224778	0	0.0103875	0.0551772	0.132129	0.0643554	0	0.0250812	0	0.037518	0	0
TCGA-XF-AAMR	high risk	0.0299437	0	0.00125863	0.0180385	0	0.19439	0	0	0.00624731	0	0	0.0518336	0.00841397	0	0.0026554	0.352652	0.132283	0.00322522	0.180903	0	0.00128254	0.0168723
TCGA-DK-AA6Q	high risk	0	0	0	0.373222	0	0	0.126091	0.0811991	0.0184165	0	0.0293446	0.0107886	0.0272939	0.00650038	0.1241	0.038701	0.0946829	0	0.0696594	0	0	0
TCGA-BT-A42C	high risk	0.142984	0	0.0254564	0.124141	0	0.0378993	0	0.060147	0.0938134	0	0.0508588	0	0.000865641	0	0.021859	0	0.0445392	0.202033	0	0.158008	0.0206	0.0167945
TCGA-FD-A3SL	high risk	0.0541037	0	0	0.062017	0	0.104935	0.000958809	0.0214092	0	0	0	0.0183909	0	0.210745	0.14523	0.231824	0.0390389	0	0.111347	0	0	0
TCGA-UY-A9PF	high risk	0.159916	0	0	0.0767203	0	0.108009	0.00706088	0.0926323	0.0263764	0	0	0.0672832	0	0.0423816	0.0818925	0.0800201	0.0438477	0.0837281	0.130132	0	0	0
TCGA-DK-A1A7	high risk	0.249082	0	0.103637	0.124456	0	0.152338	0.0145758	0.0594444	0.0513603	0	0	0.0398202	0.00348684	0.0359506	0.0066452	0.0450164	0.0143726	0.0347437	0.0650721	0	0	0
TCGA-ZF-AA52	high risk	0.0150087	0	0	0.147334	0	0.0355377	0	0.00922943	0.00522668	0	0	0.0676687	0	0.338194	0.034945	0.254797	0.0315166	0	0	0.0429159	0	0.0176266
TCGA-GV-A3QK	high risk	0.0146016	0.0162364	0	0.196854	0	0.0673731	0.125616	0.113486	0.0364193	0	0	0.0124677	0	0.0969811	0.0150156	0.0617957	0.0229272	0.176758	0.0434683	0	0	0
TCGA-CU-A0YO	high risk	0.00787809	0.0267978	0.00630103	0.0795236	0	0.164397	0.0417841	0.0294061	0.0566823	0	0	0.0398084	0	0.0424553	0.0633424	0.0978514	0.0561998	0.147541	0.121298	0	0.00946585	0.00926717
TCGA-DK-A3IL	high risk	0.404872	0.0231777	0.0233696	0.0218888	0	0.0789069	0	0.0919637	0	0	0	0.0254948	0	0.1536	0.0586749	0.0386097	0	0.0371055	0.0423365	0	0	0
TCGA-FD-A3SJ	high risk	0.152273	0	0.0189189	0.0282316	0	0.126999	0	0.0243936	0.0399863	0	0.0193801	0.00539183	0.00850767	0.144746	0.100454	0.147643	0.0584669	0	0.124609	0	0	0
TCGA-XF-A9SJ	high risk	0.0732092	0	0.0731484	0.253314	0	0.0668777	0.0904288	0.0139696	0.00763284	0	0.0577892	0.00889193	0.0162814	0.0550535	0.112531	0.140642	0.0055289	0	0.0247007	0	0	0
TCGA-UY-A9PE	high risk	0.135102	0	0.121637	0.0400781	0	0	0	0.0689648	0.0134804	0	0	0.0282306	0	0.324246	0.111343	0.0869803	0	0	0.0699379	0	0	0
TCGA-G2-A2ES	high risk	0	0	0.00169095	0.0913049	0	0.0757031	0.175118	0.0269178	0	0	0.0112724	0.0118249	0	0.204499	0.0962262	0.170531	0	0.08422	0.0121921	0	0.0356515	0.002848
TCGA-XF-AAN4	high risk	0.0309896	0	0	0.0485288	0	0.0768113	0.0636168	0.0168412	0.00248319	0.0151179	0	0.0345768	0.0757129	0	0.151243	0.210076	0.028002	0.0240845	0.19849	0	0.0234262	0
TCGA-BT-A20X	high risk	0.00920358	0	0.0784307	0.156092	0	0.0592695	0.179268	0.0203651	0.0015462	0	0.0590628	0	0.0161176	0.120463	0.119349	0.0805849	0.00550207	0.0430235	0.0511485	0	0	0.000573654
TCGA-FJ-A3ZF	high risk	0	0.0919438	0.035688	0.204431	0.0151925	0	0	0.0459238	0.0498041	0	0	0.130644	0.0276287	0.0448798	0.00438141	0.133356	0	0.132418	0.0837096	0	0	0
TCGA-BT-A20U	high risk	0	0.0036629	0.012883	0.0921661	0	0.103661	0.0157645	0.0880783	0.0253632	0	0.0213482	0.00516876	0	0.273612	0.0806814	0.199793	0.0319283	0.00482668	0.0312214	0	0	0.00984144
TCGA-GV-A3JV	high risk	0.140457	0	0.107244	0.183642	0	0.124368	0.0734447	0.0570329	0.039031	0.00754514	0	0.00429007	0	0.0446136	0.0744731	0.0711014	0.0350338	0	0.0377235	0	0	0
TCGA-C4-A0F1	high risk	0.0235632	0	0.0635233	0.0264011	0	0.158349	0.0145274	0.0257205	0.00309336	0	0	0.0302166	0	0.100741	0.163667	0.109954	0.0882113	0.0119425	0	0.133422	0.0234147	0.023252
TCGA-XF-A9SZ	high risk	0.000159673	0.0195214	0	0.0284328	0	0.047381	0.00618065	0.0152102	0.00760792	0	0.0431358	0	0	0.532513	0.0123548	0.165575	0	0	0	0.0903037	0	0.0316236
TCGA-4Z-AA7S	high risk	0.0353111	0.0964356	0.0106696	0.0280884	0.0177424	0.129608	0	0.115224	0	0	0	0.00692261	0.0123318	0	0.00604074	0.148949	0.0509393	0.16514	0.175075	0	0	0.00152201
TCGA-E7-A97P	high risk	0.0144896	0	0.00732558	0.346353	0	0.0142658	0.178462	0.0719629	0	0	0.0623911	0.0272444	0	0.027667	0.132932	0.0444126	0.0218102	0.0109257	0.0397581	0	0	0
TCGA-G2-A2EC	high risk	0.0412621	0	0.106815	0.0535037	0	0.340009	5.27e-05	0.0275753	0.124046	0	0	0.0553698	0.00459156	0	0.0119786	0.0599538	0.0222274	0.060888	0.091728	0	0	0
TCGA-ZF-A9R3	high risk	0	0.0125037	0.0655949	0.0649905	0	0.16328	0.00907235	0.0584652	0.0852429	0	0	0.0484075	0.0105982	0	0.00278773	0.0489617	0.243106	0.123739	0.0620068	0	0	0.00124258
TCGA-LT-A5Z6	high risk	0.159126	0	0.131068	0.167145	0	0.0819642	0.0327534	0.060973	0.0342767	0	0.00636453	0.0258524	0	0.148129	0.0278033	0.0671842	0.00583792	0.00305212	0.0484701	0	0	0
TCGA-FD-A3SQ	high risk	0.275925	0	0.122512	0.0242323	0	0.0704772	0.00218191	0.0294333	0.0260307	0	0.0240066	0.0155444	0	0.280601	0.0192376	0.0402106	0.0140681	0	0.055539	0	0	0
TCGA-BT-A20Q	high risk	0.0378701	0	0.151852	0.132671	0	0.0747488	0.0649644	0.0635686	0.0536581	0	0	0.0219661	0.013304	0.00257449	0.0934304	0.10376	0.122222	0.0156306	0.0477789	0	0	0
TCGA-ZF-A9R0	high risk	0.0212017	0.0142641	0.00509973	0.109356	0	0.0295151	0.0832281	0.0477738	0.031798	0	0.0242181	0	0	0.319574	0.164961	0.0914291	0.0286792	0	0.0289021	0	0	0
TCGA-FD-A5C1	high risk	0.013123	0	0.0283821	0.174017	0	0.102772	0.114567	0.0436043	0	0	0.0132051	0	0.0101116	0.100186	0.100433	0.182784	0.0177669	0.0732403	0.0190967	0	0	0.00671051
TCGA-ZF-AA5P	high risk	0.339429	0	0.141382	0.0965429	0	0.0583787	0.0221366	0.00682952	0.00565837	0	0	0.0172754	0.00545887	0.00251882	0.13689	0.0695826	0	0.0421	0.0537965	0.00202041	0	0
TCGA-DK-AA75	high risk	0.0389565	0.0675489	0.00319975	0.103774	0	0.120071	0	0	0.00303827	0.0721922	0	0	0.0307982	0.208499	0.0612166	0	0.0598581	0	0.205143	0	0	0.0257048
TCGA-DK-A6B2	high risk	0.155572	0	0.123264	0.0859325	0	0.0770495	0.0176147	0.0215383	0.0405183	0	0	0.0180349	0.00430067	0.0819273	0.119624	0.141108	0.0145978	0.0284223	0.069146	0	0	0.00134937
TCGA-DK-A2I6	high risk	0	0.056344	0.0028331	0.142792	0	0.252822	0.0515278	0.0106293	0	0	0.0436529	0	0.019681	0.0692108	0.0256022	0.0688955	0.0109561	0.222121	0	0.0223518	0	0.000580541
TCGA-FD-A5BT	high risk	0.0370021	0	0.0111141	0.254926	0	0.0206916	0.081682	0.0784041	0.0218157	0.0020688	0	0.0271981	0.013742	0.05067	0.107014	0.254861	0.0106225	0	0.0281886	0	0	0
TCGA-DK-A1A3	high risk	0.152515	0	0.073262	0.0837524	0	0.107175	0.0418848	0.05257	0.0205112	0	0	0.0352087	0.0193721	0.0665071	0.0380075	0.11508	0.0387051	0.058445	0.0970049	0	0	0
TCGA-DK-A2I2	high risk	0	0.0433098	0	0.0549359	0	0.165914	0.00162949	0	0.00808304	0	0.016076	0	0	0.186936	0.0423972	0.123834	0.12578	0	0	0.180761	0.000351036	0.0499923
TCGA-XF-A9T4	high risk	0	0.00658349	0.0235547	0.100733	0	0.204941	0.0331677	0.0467869	0	0	0	0.0682483	0	0.123005	0.134155	0.103371	0.0705264	0.00895718	0	0.0464027	0.0162869	0.0132819
TCGA-GU-A42R	high risk	0	0.0231943	0.0319345	0.201831	0	0	0	0.0156178	0	0	0	0.0136735	0.109593	0.00558438	0.0102335	0.192453	0.0046972	0.240755	0.14715	0	0.0032837	0
TCGA-G2-A3IB	high risk	0	0	0.00133438	0.111216	0	0.207937	0.0165805	0	0	0	0.0185764	0.0515613	0	0.330715	0.0294949	0.0985767	0.030105	0.0783601	0.0242597	0	0.00128328	0
TCGA-2F-A9KR	high risk	0.0617326	0	0.0557566	0.0978442	0	0.0882125	0.0617526	0.162056	0	0	0.0152055	0.0659232	0.0222489	0.0600851	0.00122546	0.0474085	0.031792	0.108262	0.078776	0	0.0222381	0.0194814
TCGA-ZF-A9RM	high risk	0.025073	0	0	0.205848	0	0.202237	0	0.0473232	0	0	0	0.144431	0.0331478	0.0808397	0.0363022	0.0513539	0.0472312	0.0280011	0.0982118	0	0	0
TCGA-DK-AA6U	high risk	0.147531	0	0.0502726	0.0947898	0	0	0	0.0361239	0.124593	0	0	0.0670842	0.0326115	0.00129406	0.0691008	0.055084	0.11308	0.0456988	0.140984	0	0	0.0217518
TCGA-R3-A69X	high risk	0.090965	0	0	0.104462	0	0.279847	0.00271704	0.0291237	0.00704992	0	0	0.0386802	0.0659172	0	0.0469634	0.195478	0.0801784	0	0.0568848	0	0	0.00173331
TCGA-FD-A5BX	high risk	0.00138001	0.00215373	0	0.0827676	0	0.0972391	0	0	0	0.0134318	0	0.0281982	0.00996728	0.317994	0.0523947	0.236766	0.144145	0	0.0135629	0	0	0
TCGA-HQ-A2OF	high risk	0	0.0118602	0.000763138	0.14232	0	0.235117	0.114061	0	0	0	0.0357774	0.0190808	0.0268858	0.0985484	0.0139504	0.283106	0	0.0100412	0	0.00848855	0	0
TCGA-FD-A62S	high risk	0.0139815	0.0210442	0.0150172	0.0502299	0	0.244945	0	0	0.0224989	0	0	0.0110709	0	0.228415	0.0717051	0.130954	0.0954141	0.0266772	0.0680461	0	0	0
TCGA-BL-A5ZZ	high risk	0.01733	0	0.00148473	0.0143003	0	0.0855772	0.0578948	0.00450497	0.00884657	0.00838246	0.00927658	0.0121301	0	0.459364	0.00227661	0.23512	0	0.0159518	0	0.0614538	0	0.00610635
TCGA-GC-A3RB	high risk	0.0308924	0	0.0141376	0.129756	0	0.171664	0.00237136	0.0245471	0.0394827	0	0	0.0443059	0.0102527	0.050253	0.0643841	0.196295	0.151605	0.051973	0	0.0180804	0	0
TCGA-BT-A3PH	high risk	0	0.0417468	0	0.0849317	0	0.15841	0	0.0646812	0	0	0	0.0214765	0.0020608	0.134719	0	0.113662	0	0.138712	0.217464	0	0.00733813	0.0147981
TCGA-FD-A6TK	high risk	0.0264671	0	0.0294153	0.177964	0	0.0822451	0.179735	0.0353571	0.00279012	0	0.0087438	0.00431573	0.00354331	0.0403944	0.11239	0.177088	0.0259536	0.0210242	0.0696786	0	0	0.00289469
TCGA-G2-A2EO	high risk	0.019852	0	0.0329514	0.242885	0	0.0587761	0.192001	0.0241406	0	0	0	0.0760609	0.0160236	0.0972745	0.0450845	0.0966296	0.00727324	0.00448643	0.0865618	0	0	0
TCGA-DK-A3IN	high risk	0.0655253	0	0.0422476	0.151961	0	0.217811	0.00554634	0	0.00766237	0	0	0.0242563	0.0135335	0	0.0437364	0.373916	0.0176914	0	0	0.0171965	0	0.0189168
TCGA-DK-A3X1	high risk	0	0.0544405	0	0.14484	0	0	0.0991284	0.132326	0.0300649	0	0	0	0.0114664	0.281183	0.0663641	0.118071	0.007451	0.0314647	0.0210814	0	0.00211754	0
TCGA-CF-A7I0	high risk	0.0894073	0	0.0353789	0.228427	0	0.124841	0.0676545	0.00129447	0.0027265	0	0	0.0583898	0.016006	0	0.0281724	0.0991628	0.095953	0.0128435	0.139743	0	0	0
TCGA-FD-A6TH	high risk	0.142883	0	0.0057982	0.0381061	0	0.122569	0	0.100219	0	0.00223361	0	0.0474591	0	0.251633	0.0972854	0.160051	0	0	0.027393	0	0	0.00436911
TCGA-GV-A40G	high risk	0	0	0.00687842	0.0191731	0	0.301714	0	0.0540438	0	0	0	0.0733865	0.0844508	0.03087	0	0.144646	0	0.234013	0.0240576	0	0	0.0267666
TCGA-UY-A8OD	high risk	0.0834666	0	0	0.102462	0	0.134652	0	0.0432151	0.0243897	0.0192588	0	0.0496392	0	0.334354	0.0639415	0.0593199	0	0	0.0853013	0	0	0
TCGA-BT-A0S7	high risk	0.123982	0	0	0.0673465	0	0.180691	0.0218367	0.0591097	0.00345261	0	0.0126661	0	0	0.150615	0.0294547	0.2427	0.0646143	0.00152443	0.0196578	0.00433532	0	0.0180133
TCGA-FD-A5BV	high risk	0.089703	0	0	0.215714	0.0105442	0.0912954	0	0	0	0	0	0	0.0243485	0.00201542	0.0461408	0.375392	0	0	0.118176	0	0.0240747	0.00259598
TCGA-HQ-A5ND	high risk	0	0.00636193	0.00189645	0.241605	0	0.121091	0.132623	0	0	0	0.0581395	0.0122483	0	0.0708127	0.200545	0.0489771	0	0.0567558	0.0489449	0	0	0
TCGA-UY-A78O	high risk	0.175033	0	0.136915	0.0131554	0.0229319	0.017111	0	0.100141	0	0.00230679	0	0.0307881	0	0.239804	0.0198088	0.0540516	0.0489295	0.0871785	0.051846	0	0	0
TCGA-GD-A3OS	high risk	0.0607995	0	0	0.063618	0	0.164399	0.00134278	0.0432674	0.0559873	0	0.00108683	0.00278547	0	0.375386	0.00887627	0.206746	0	0.015706	0	0	0	0
TCGA-GU-AATQ	high risk	0	0.0818178	0	0.0832599	0	0.0570393	0	0.0622305	0.0200728	0	0.00497892	0	0.0246937	0.31771	0.173827	0.0924575	0.0257555	0	0.0561572	0	0	0
TCGA-4Z-AA7R	high risk	0.0787021	0	0.0550815	0.0838398	0	0.0739891	0	0.0399972	0.0383757	0	0.0254154	0	0	0.15014	0	0.332301	0	0.0455877	0	0.073641	0	0.00292992
TCGA-2F-A9KP	high risk	0.207721	0.0647263	0.000139253	0.0427783	0	0.113594	0.0522342	0.010121	0.00798467	0	0.0393565	0	0.0310144	0	0	0.115561	0	0.232825	0.00986701	0.021062	0	0.051015
TCGA-DK-A1A5	high risk	0	0.0153921	0	0.151637	0	0.0382801	0.0676701	0.090569	0.00125056	0	0	0.00681646	0.00299918	0.276612	0.0420901	0.0794653	0.113606	0.085054	0.0285584	0	0	0
TCGA-XF-A9T3	high risk	0.185802	0	0.0224251	0.058352	0	0.115456	0.0607674	0.0268387	0	0	0.0167434	0.0146208	0	0.229902	0.088031	0.130667	0	0	0.0503949	0	0	0
TCGA-FD-A3N5	high risk	0.011639	0	0.00777871	0.114291	0	0.0665886	0.117521	0.0476399	0	0	0	0.0474956	0	0.372063	0.0376475	0.0966202	0.0531186	0.00668549	0	0.00705679	0	0.0138544
TCGA-KQ-A41R	high risk	0	0.0286394	0.0014191	0.0437476	0	0.164993	0	0.0357514	0.0657642	0	0	0.0659056	0	0.104932	0.0595694	0.176821	0	0.100344	0.1451	0	0	0.00701314
TCGA-FT-A61P	high risk	0.0333395	0	0.0126804	0.0709625	0	0.106127	0.119603	0.0661122	0	0	0.0153985	0.0182525	0.00866457	0.140163	0.0851405	0.196461	0.0417871	0.00814218	0.0771658	0	0	0
TCGA-XF-A9T2	high risk	0.00296686	0.00142191	0	0.0283958	0	0.0451674	0.00170996	0.0391695	0.027239	0.005644	0	0.062602	0	0.430924	0	0.150744	0.00577487	0	0.197524	0	0	0.000717073
TCGA-K4-A4AB	high risk	0	0.0380421	0	0.0381403	0	0.270309	0.0293553	0.037503	0.0106488	0	0.00648692	0.0337153	0.00199895	0.0232198	0.012059	0.175288	0.149877	0.0945263	0.0578713	0	0.0121139	0.00884498
TCGA-XF-AAN7	high risk	0.0618972	0	0.00844935	0.0639178	0	0.260508	0.0314652	0.017906	0	0	0	0.0376701	0.00807372	0.149043	0.0798962	0.217567	0	0	0.0636063	0	0	0
TCGA-CU-A5W6	high risk	0.0604492	0	0.144577	0.0585161	0	0.0547143	0	0.044938	0.00477112	0	0	0.0726599	0.00773648	0.100432	0.0219651	0.0746877	0.0116287	0.209293	0.0890453	0	0	0.0445866
TCGA-FD-A5BZ	high risk	0.10407	0	0.00855566	0.00589067	0	0.0568262	0	0.0320147	0.0249479	0.00994998	0	0.0165197	0	0.433517	0.0856508	0.123548	0	0	0.0985092	0	0	0
TCGA-FD-A3B7	high risk	0.0210422	0	0.00642121	0.302256	0	0.0281517	0.144279	0.0201067	0	0	0.0236822	0	0	0.174459	0.104566	0.124338	0.00826035	0.00431644	0	0.0205998	0	0.0175207
TCGA-XF-AAN0	high risk	0.129533	0	0.134886	0.13097	0	0.116425	0.0326507	0.0624031	0.00125923	0	0	0.0216945	0.00618356	0.0253362	0.103351	0.143988	0.00258784	0	0.0483059	0	0	0.0404258
TCGA-FD-A3SN	high risk	0	0	0.00493739	0.248291	0	0.048806	0.093166	0.0406048	0	0	0	0.0487919	0.000446937	0.170147	0.0552331	0.17832	0	0.0562434	0.0483351	0	0	0.00667743
TCGA-GD-A3OP	high risk	0.122626	0	0.00705448	0.103975	0	0.221167	0	0.0205305	0	0	0	0.0710754	0.0175416	0.0173653	0.092231	0.128189	0.0301545	0	0.168091	0	0	0
TCGA-GU-AATO	high risk	0	0.0185967	0.121149	0.155885	0	0.0646788	0.0973389	0.0786681	0.0271348	0	0	0.0203064	0.0292892	0.0724363	0.0895007	0.129448	0.00660091	0	0.0536836	0	0	0.0352835
TCGA-FD-A6TA	high risk	0.17023	0	0.172316	0.0841674	0	0.149105	0	0.0309708	0.0167247	0	0	0.0226499	0.0157024	0.108925	0.0912088	0.104006	0.00189246	0	0.0321012	0	0	0
TCGA-ZF-AA56	high risk	0.0593249	0.0359459	0.0662104	0.0650331	0	0.24129	0.000255288	0.0497065	0.000263186	0	0.0063782	0	0.0423864	0	0.0338791	0.19688	0.0288498	0.0743965	0.033166	0.0158253	0.00375915	0.0464505
TCGA-E7-A97Q	high risk	0.080171	0	0.0721866	0.225856	0	0.00647414	0.0798071	0.013272	0.022676	0	0	0.0586725	0.0097608	0.0064066	0.152063	0.150672	0.00640888	0.00893125	0.106642	0	0	0
TCGA-XF-A8HH	high risk	0.0754811	0	0.0094262	0.0515594	0	0.0646993	0	0.0450034	0.0652322	0	0	0.0143219	0.00670424	0.222519	0.109851	0.168615	0.0599816	0	0.103664	0	0.00294204	0
TCGA-XF-AAN8	high risk	0.054456	0	0.0102043	0.0449986	0	0.0705889	0.058215	0	0.00468961	0.00222033	0	0.00289539	0.0190646	0.037844	0.0204244	0.391212	0.00199636	0	0.147815	0	0	0.133376
TCGA-CF-A9FL	high risk	0.0366651	0.0193353	0.07001	0.15013	0	0.0578502	0	0.0431909	0.00202904	0	0	0.0682355	0.0161477	0.042473	0.0335586	0.286979	0.0860617	0.0149387	0.0723956	0	0	0
TCGA-FD-A3SR	high risk	0.0175467	0	0.00209378	0.175273	0	0.201572	0.00335137	0.0205553	0.0512967	0	0	0.0271287	0.0100538	0.086595	0.190183	0.101391	0.0226077	0.001501	0.0888493	0	0	0
TCGA-XF-A9SW	high risk	0.0865673	0	0.00359977	0.0611735	0	0.140133	0.0337355	0.00962693	0.0105701	0	0	0.0215761	0.0270104	0	0.0258431	0.377904	0.0152236	0.046845	0.134065	0	0	0.00612636
TCGA-CF-A1HR	high risk	0.179634	0	0.107126	0.193602	0	0.112789	0	0.00515414	0.00165095	0	0	0.0451324	0.0180413	0.0146893	0.0327862	0.0902091	0.00959327	0.0779536	0.111638	0	0	0
TCGA-DK-AA6T	high risk	0.0659263	0.516932	0	0.128201	0	0	0.0273269	0.0550403	0.00778506	0	0	0.0196204	0.00723717	0	0.00952041	0.0585138	0	0.0892678	0.0146291	0	0	0
TCGA-FD-A3SS	high risk	0.064614	0	0.0195069	0.00306639	0	0.242904	0	0.0422845	0	0	0.0518952	0	0.00223827	0.116443	0.0631469	0.183456	0	0.170166	0	0	0.0402799	0
TCGA-ZF-A9R9	high risk	0.123234	0	0.0842189	0.0662196	0	0.182583	0.00418735	0	0.0631331	0.00916727	0	0.0178566	0.00926621	0.106414	0.102975	0.192207	0.00303081	0	0.0316099	0.00244107	0	0.00145592
TCGA-KQ-A41P	high risk	0.101926	0	0.00646416	0.0451828	0	0.0746327	0	0.0120077	0.0217037	0	0	0.0355896	0	0.432849	0.0435661	0.151526	0	0.0138069	0.0607449	0	0	0
TCGA-XF-A9SL	high risk	0.246771	0	0.0556002	0.11751	0	0.0744746	0.0464647	0.00166754	0.0503962	0	0	0.0271958	0.0358515	0.0720666	0.00515018	0.136614	0	0.0130044	0.117234	0	0	0
TCGA-GU-AATP	high risk	0.0927123	0	0.0148479	0.073059	0	0.0945377	0.0434354	0.0420144	0.0255813	0	0.0119436	0	0	0.252788	0.0337602	0.171607	0	0.0974644	0.0458548	0	0	0.000393456
TCGA-XF-A9T6	high risk	0	0.00237977	0.000628405	0.127679	0	0	0.0703215	0.0403568	0.0107894	0	0	0.0473242	0	0.134471	0.0408834	0.242805	0.0905763	0.127968	0.0621733	0	0	0.00164477
TCGA-2F-A9KT	high risk	0	0.00448454	0.011104	0.0705219	0	0.166929	0	0.0727789	0	0	0.0154063	0.0365379	0	0.180397	0.0676069	0.222043	0	0	0.0106315	0	0.0183057	0.123254
TCGA-CU-A0YN	high risk	0.0232201	0	0.00144739	0.140585	0	0.256987	0.00548612	0	0	0	0.0411248	0	0	0.259236	0.0223342	0.0888436	0.012422	0.0108914	0	0.101114	0	0.0363083
TCGA-DK-A3IK	high risk	0.000715515	0.177509	0.073545	0.119151	0	0.0500743	0	0.054951	0	0.0113747	0	0.0364882	0.00787702	0.179995	0.129211	0.0829204	0.000612189	0	0.0755759	0	0	0
TCGA-FD-A5BY	high risk	0.0105215	0	0.00117103	0.042877	0	0.15275	0	0.0128905	0.00237653	0.0187347	0	0.0563404	0	0.255796	0.0605693	0.145266	0.0857008	0.00164803	0.142521	0	0	0.0108365
TCGA-BT-A2LD	high risk	0.0156543	0	0.0912919	0.131023	0	0.0930047	0.0582111	0.0874024	0.0132126	0	0	0.0105059	0	0.0826024	0.141419	0.226463	0	0.00397427	0.0430314	0	0	0.00220323
TCGA-GU-A42P	high risk	0.117375	0	0	0.065141	0	0.247527	0	0.0724226	0	0	0	0.00135413	0.0191253	0.202517	0	0.012828	0	0.189254	0.0676443	0	0	0.00481179
TCGA-UY-A78M	high risk	0.0527842	0	0.0105886	0.0197214	0	0.0714903	0	0	0.0365209	0	0	0.0338682	0	0.555746	0.0390677	0.0623707	0	0.0587849	0.056727	0	0	0.00233016
TCGA-GD-A6C6	high risk	0.0191726	0	0.00665909	0.10571	0	0.0857166	0	0	0.000557259	0	0	0.0282564	0.0225931	0.0435816	0.0164578	0.484738	0	0.0887113	0.0978459	0	0	0
TCGA-DK-A2HX	high risk	0.0520406	0	0.0006935	0.0613698	0	0.159349	0.00395733	0.00864022	0.0588354	0	0	0.057826	0.0183685	0.032582	0.0045844	0.201253	0.00106099	0.129168	0.209411	0	0	0.000859983
TCGA-BL-A3JM	high risk	0.0268996	0	0.0115023	0.0801514	0	0	0.0227107	0.078454	0.0108855	0.0410659	0	0.0110402	0	0.442159	0.132689	0.083395	0.00495289	0	0.0540945	0	0	0
TCGA-XF-AAMW	high risk	0.00538867	0.0088711	0.00311878	0	0	0.241417	0.0461819	0.011273	0.0205636	0	0.00806735	0	0.00502206	0.157351	0.116484	0.17347	0.110746	0.0496007	0.0205963	0	0.00764919	0.0141987
TCGA-FT-A3EE	high risk	0.132387	0.104864	0	0.0510521	0	0.0763072	0.00547364	0.0501292	0	0	0	0	0.00033963	0.011985	0	0.148814	0.0837966	0.244985	0.0439881	0	0.00469968	0.0411787
TCGA-FD-A3B5	high risk	0	0.000788321	0	0	0	0.224511	0	0.054821	0	0	0.0505711	0	0	0.365329	0.0259114	0.114738	0	0.129298	0.0168533	0	0	0.017179
TCGA-XF-A9SV	high risk	0	0.0323978	0.0406621	0.0707592	0	0.0742106	0	0	0.0246379	0.0235853	0	0	0	0.505988	0.0364947	0.118233	0	0	0.0388986	0.0206288	0	0.0135036
TCGA-FD-A43N	high risk	0.290211	0	0.118624	0.0876213	0	0.0692793	0	0	0.00392397	0	0	0	0	0.148342	0.054816	0.0926551	0	0.0544346	0	0.0702325	0.00329891	0.00656237
TCGA-CU-A3YL	high risk	0.0222044	0	0.0183406	0.26068	0	0.118515	0.0509514	0.0953686	0.0128641	0	0	0.0254862	0.0149315	0.0358786	0.110484	0.0717027	0.0864782	0.0094109	0.0667038	0	0	0
TCGA-XF-AAMH	high risk	0.0424514	0	0.0113905	0.18731	0.0130414	0	0.0684672	0.00267078	0.00344949	0	0	0.0300058	0	0.321778	0.0172345	0.187698	0	0.0460999	0.0684023	0	0	0
TCGA-BL-A13J	high risk	0.0425896	0	0.014627	0.126887	0	0	0.0821615	0.033619	0.0217447	0	0.0240925	0	0	0.254243	0.101119	0.167999	0	0.0697167	0.0598415	0	0	0.0013587
TCGA-XF-A9SP	high risk	0.206608	0	0.119714	0.135584	0	0.0250925	0	0.0177113	0.0104263	0.00472618	0	0.0481892	0.0027953	0.0196594	0.0539125	0.260416	0	0.0114853	0.0836797	0	0	0
TCGA-2F-A9KW	high risk	0.0988999	0	0.0108881	0.00821912	0	0.0319043	0.0194012	0	0.0384418	0	0	0	0	0.336583	0.0241012	0.184921	0	0.131273	0.00614404	0	0.0486187	0.0606039
TCGA-K4-A3WU	high risk	0.251067	0.00562148	0.0390823	0.0586871	0	0.285204	0.0340476	0	0.0173136	0	0	0.0116904	0	0.143953	0.00964321	0.0706624	0.0159126	0.0116062	0.039045	0	0	0.0064643
TCGA-FJ-A871	high risk	0	0.00630444	0.00609688	0.0632791	0.0819293	0.194082	0.172689	0	0	0	0.0398887	0	0	0.283288	0.00649897	0.117162	0.000232778	0.000829793	0.0277189	0	0	0
TCGA-FD-A6TF	high risk	0.155113	0	0	0.133872	0	0.100385	0	0.0276756	0.00724105	0	0	0.021196	0.0175242	0.0918061	0.0464458	0.236187	0.0114604	0	0.151093	0	0	0
TCGA-BT-A3PK	high risk	0.0204552	0	0.0024109	0.0365664	0	0.0575813	0.0763155	0.0335107	0.0159538	0	0.000327329	0.00502075	0	0.226363	0.107467	0.097006	0	0.171722	0	0.0872137	0	0.0620864
TCGA-XF-A9SU	high risk	0.221192	0	0.183413	0.0849153	0	0.0150351	0.0238035	0	0.0237049	0.0270095	0	0	0.00647582	0.0867323	0.150662	0.121303	0	0	0.0518073	0	0	0.003946
TCGA-GV-A3QH	high risk	0	0.0627367	0	0.0870785	0	0.0837985	0	0.0359272	0	0	0.031741	0.0198106	0.0626473	0.181838	0.0107976	0.0898044	0	0.33382	0	0	0	0
TCGA-FD-A3SM	high risk	0	0.00758542	0.0225901	0.0166702	0	0.138106	0	0.0418467	0	0	0	0.0320563	0	0.527932	0.0646597	0.0604726	0	0.0137845	0.0742961	0	0	0
TCGA-G2-AA3C	high risk	0	0	0.00163019	0.0477111	0	0.0975514	0	0	0	0	0	0.0566361	0.180836	0	0.010286	0.547994	0	0	0.0573548	0	0	0
TCGA-XF-AAMT	high risk	0.00225711	0.0246018	0.00676764	0.0290133	0	0.0922629	0.00371881	0	0.0374726	0	0	0.00108057	0	0.345315	0.00896191	0.336357	0	0.0105673	0.0880808	0	0	0.0135438
