# Supplementary material for: Identification of an IRGP Signature to Predict Prognosis and Immunotherapeutic Efficiency in Bladder Cancer
Source: Front Mol Biosci. 2021 Apr 15;8:607090. doi: 10.3389/fmolb.2021.607090 (PMC8082411; doi:10.3389/fmolb.2021.607090)
Supplement: Supplementary File 2 — The raw data of TME scores. [file Table_2.XLSX]

## Sheet: Sheet1
Patient	Responder	IRGP
TCGA-2F-A9KO	Not responder	high
TCGA-2F-A9KP	Not responder	high
TCGA-2F-A9KQ	Not responder	low
TCGA-2F-A9KR	responder	high
TCGA-2F-A9KT	Not responder	high
TCGA-2F-A9KW	responder	high
TCGA-4Z-AA7M	Not responder	low
TCGA-4Z-AA7N	Not responder	high
TCGA-4Z-AA7O	Not responder	low
TCGA-4Z-AA7Q	Not responder	high
TCGA-4Z-AA7R	Not responder	high
TCGA-4Z-AA7S	responder	high
TCGA-4Z-AA7W	Not responder	low
TCGA-4Z-AA7Y	responder	low
TCGA-4Z-AA80	responder	high
TCGA-4Z-AA81	Not responder	low
TCGA-4Z-AA82	Not responder	high
TCGA-4Z-AA83	responder	high
TCGA-4Z-AA84	Not responder	high
TCGA-4Z-AA86	Not responder	low
TCGA-4Z-AA87	responder	high
TCGA-4Z-AA89	responder	low
TCGA-5N-A9KI	responder	high
TCGA-5N-A9KM	responder	low
TCGA-BL-A0C8	responder	high
TCGA-BL-A13I	Not responder	high
TCGA-BL-A13J	Not responder	high
TCGA-BL-A3JM	responder	high
TCGA-BL-A5ZZ	Not responder	high
TCGA-BT-A0S7	Not responder	high
TCGA-BT-A0YX	Not responder	high
TCGA-BT-A20J	Not responder	low
TCGA-BT-A20N	Not responder	low
TCGA-BT-A20O	Not responder	low
TCGA-BT-A20P	Not responder	high
TCGA-BT-A20Q	Not responder	high
TCGA-BT-A20R	Not responder	high
TCGA-BT-A20T	Not responder	high
TCGA-BT-A20U	Not responder	high
TCGA-BT-A20V	responder	low
TCGA-BT-A20W	Not responder	high
TCGA-BT-A20X	responder	high
TCGA-BT-A2LA	Not responder	high
TCGA-BT-A2LB	Not responder	high
TCGA-BT-A2LD	Not responder	high
TCGA-BT-A3PH	responder	high
TCGA-BT-A3PJ	responder	low
TCGA-BT-A3PK	Not responder	high
TCGA-BT-A42C	responder	high
TCGA-BT-A42E	Not responder	low
TCGA-BT-A42F	Not responder	high
TCGA-C4-A0EZ	Not responder	high
TCGA-C4-A0F0	responder	high
TCGA-C4-A0F1	Not responder	high
TCGA-C4-A0F6	Not responder	high
TCGA-C4-A0F7	Not responder	low
TCGA-CF-A1HR	responder	high
TCGA-CF-A1HS	Not responder	high
TCGA-CF-A27C	responder	low
TCGA-CF-A3MF	responder	high
TCGA-CF-A3MG	responder	low
TCGA-CF-A3MH	responder	low
TCGA-CF-A3MI	responder	low
TCGA-CF-A47S	responder	low
TCGA-CF-A47T	Not responder	low
TCGA-CF-A47V	responder	low
TCGA-CF-A47W	responder	low
TCGA-CF-A47X	responder	low
TCGA-CF-A47Y	responder	low
TCGA-CF-A5U8	responder	low
TCGA-CF-A5UA	Not responder	low
TCGA-CF-A7I0	Not responder	high
TCGA-CF-A8HX	responder	low
TCGA-CF-A8HY	responder	high
TCGA-CF-A9FF	responder	high
TCGA-CF-A9FH	responder	low
TCGA-CF-A9FL	Not responder	high
TCGA-CF-A9FM	responder	low
TCGA-CU-A0YN	Not responder	high
TCGA-CU-A0YO	responder	high
TCGA-CU-A0YR	responder	low
TCGA-CU-A3KJ	responder	low
TCGA-CU-A3QU	responder	low
TCGA-CU-A3YL	responder	high
TCGA-CU-A5W6	responder	high
TCGA-CU-A72E	Not responder	high
TCGA-DK-A1A3	responder	high
TCGA-DK-A1A5	Not responder	high
TCGA-DK-A1A6	responder	high
TCGA-DK-A1A7	responder	high
TCGA-DK-A1AA	responder	low
TCGA-DK-A1AB	Not responder	low
TCGA-DK-A1AC	responder	low
TCGA-DK-A1AD	Not responder	low
TCGA-DK-A1AE	Not responder	high
TCGA-DK-A1AF	Not responder	low
TCGA-DK-A1AG	responder	low
TCGA-DK-A2HX	Not responder	high
TCGA-DK-A2I1	Not responder	low
TCGA-DK-A2I2	Not responder	high
TCGA-DK-A2I4	Not responder	low
TCGA-DK-A2I6	Not responder	high
TCGA-DK-A3IK	Not responder	high
TCGA-DK-A3IL	Not responder	high
TCGA-DK-A3IM	Not responder	high
TCGA-DK-A3IN	Not responder	high
TCGA-DK-A3IQ	Not responder	high
TCGA-DK-A3IS	responder	high
TCGA-DK-A3IT	Not responder	high
TCGA-DK-A3IU	Not responder	high
TCGA-DK-A3IV	Not responder	high
TCGA-DK-A3WW	Not responder	low
TCGA-DK-A3WX	Not responder	high
TCGA-DK-A3WY	Not responder	high
TCGA-DK-A3X1	Not responder	high
TCGA-DK-A3X2	Not responder	low
TCGA-DK-A6AV	responder	low
TCGA-DK-A6AW	responder	high
TCGA-DK-A6B0	responder	low
TCGA-DK-A6B1	responder	high
TCGA-DK-A6B2	Not responder	high
TCGA-DK-A6B5	responder	low
TCGA-DK-A6B6	responder	low
TCGA-DK-AA6L	responder	low
TCGA-DK-AA6M	Not responder	low
TCGA-DK-AA6P	responder	low
TCGA-DK-AA6Q	Not responder	high
TCGA-DK-AA6R	Not responder	low
TCGA-DK-AA6S	Not responder	high
TCGA-DK-AA6T	Not responder	high
TCGA-DK-AA6U	Not responder	high
TCGA-DK-AA6W	Not responder	low
TCGA-DK-AA6X	responder	high
TCGA-DK-AA71	Not responder	high
TCGA-DK-AA74	Not responder	low
TCGA-DK-AA75	Not responder	high
TCGA-DK-AA76	responder	high
TCGA-DK-AA77	responder	low
TCGA-E5-A2PC	responder	high
TCGA-E5-A4TZ	responder	high
TCGA-E5-A4U1	responder	low
TCGA-E7-A3X6	Not responder	high
TCGA-E7-A3Y1	responder	low
TCGA-E7-A4IJ	responder	high
TCGA-E7-A4XJ	responder	high
TCGA-E7-A519	responder	low
TCGA-E7-A541	Not responder	high
TCGA-E7-A5KE	responder	high
TCGA-E7-A5KF	responder	high
TCGA-E7-A677	Not responder	low
TCGA-E7-A678	responder	low
TCGA-E7-A6MD	responder	high
TCGA-E7-A6ME	Not responder	low
TCGA-E7-A6MF	responder	low
TCGA-E7-A7DU	responder	low
TCGA-E7-A7DV	Not responder	high
TCGA-E7-A7PW	responder	low
TCGA-E7-A7XN	Not responder	high
TCGA-E7-A85H	responder	low
TCGA-E7-A8O7	responder	high
TCGA-E7-A8O8	responder	high
TCGA-E7-A97P	Not responder	high
TCGA-E7-A97Q	responder	high
TCGA-FD-A3B3	Not responder	high
TCGA-FD-A3B4	Not responder	low
TCGA-FD-A3B5	Not responder	high
TCGA-FD-A3B6	Not responder	high
TCGA-FD-A3B7	Not responder	high
TCGA-FD-A3B8	Not responder	low
TCGA-FD-A3N5	Not responder	high
TCGA-FD-A3N6	responder	low
TCGA-FD-A3NA	Not responder	high
TCGA-FD-A3SJ	Not responder	high
TCGA-FD-A3SL	Not responder	high
TCGA-FD-A3SM	Not responder	high
TCGA-FD-A3SN	Not responder	high
TCGA-FD-A3SO	Not responder	high
TCGA-FD-A3SP	Not responder	high
TCGA-FD-A3SQ	Not responder	high
TCGA-FD-A3SR	responder	high
TCGA-FD-A3SS	Not responder	high
TCGA-FD-A43N	Not responder	high
TCGA-FD-A43P	Not responder	low
TCGA-FD-A43S	Not responder	low
TCGA-FD-A43U	Not responder	high
TCGA-FD-A43X	responder	low
TCGA-FD-A43Y	Not responder	low
TCGA-FD-A5BR	Not responder	high
TCGA-FD-A5BS	Not responder	low
TCGA-FD-A5BT	Not responder	high
TCGA-FD-A5BU	Not responder	high
TCGA-FD-A5BV	Not responder	high
TCGA-FD-A5BX	Not responder	high
TCGA-FD-A5BY	Not responder	high
TCGA-FD-A5BZ	Not responder	high
TCGA-FD-A5C0	Not responder	low
TCGA-FD-A5C1	Not responder	high
TCGA-FD-A62N	Not responder	low
TCGA-FD-A62O	Not responder	low
TCGA-FD-A62P	Not responder	high
TCGA-FD-A62S	Not responder	high
TCGA-FD-A6TA	Not responder	high
TCGA-FD-A6TB	Not responder	low
TCGA-FD-A6TC	Not responder	high
TCGA-FD-A6TD	Not responder	low
TCGA-FD-A6TE	responder	low
TCGA-FD-A6TF	Not responder	high
TCGA-FD-A6TG	Not responder	low
TCGA-FD-A6TH	Not responder	high
TCGA-FD-A6TI	responder	high
TCGA-FD-A6TK	Not responder	high
TCGA-FJ-A3Z7	responder	high
TCGA-FJ-A3Z9	responder	low
TCGA-FJ-A3ZE	responder	low
TCGA-FJ-A3ZF	responder	high
TCGA-FJ-A871	Not responder	high
TCGA-FT-A3EE	Not responder	high
TCGA-FT-A61P	Not responder	high
TCGA-G2-A2EC	Not responder	high
TCGA-G2-A2EF	responder	high
TCGA-G2-A2EJ	responder	low
TCGA-G2-A2EK	responder	low
TCGA-G2-A2EL	Not responder	high
TCGA-G2-A2EO	Not responder	high
TCGA-G2-A2ES	responder	high
TCGA-G2-A3IB	responder	high
TCGA-G2-A3IE	responder	high
TCGA-G2-A3VY	responder	low
TCGA-G2-AA3B	responder	low
TCGA-G2-AA3C	Not responder	high
TCGA-G2-AA3D	responder	low
TCGA-G2-AA3F	responder	high
TCGA-GC-A3BM	responder	high
TCGA-GC-A3I6	responder	low
TCGA-GC-A3OO	Not responder	high
TCGA-GC-A3RB	Not responder	high
TCGA-GC-A3RC	Not responder	low
TCGA-GC-A3RD	responder	low
TCGA-GC-A3WC	Not responder	low
TCGA-GC-A3YS	Not responder	low
TCGA-GC-A4ZW	responder	high
TCGA-GD-A2C5	Not responder	low
TCGA-GD-A3OP	Not responder	high
TCGA-GD-A3OQ	Not responder	low
TCGA-GD-A3OS	Not responder	high
TCGA-GD-A6C6	responder	high
TCGA-GD-A76B	Not responder	low
TCGA-GU-A42P	responder	high
TCGA-GU-A42Q	Not responder	low
TCGA-GU-A42R	responder	high
TCGA-GU-A762	Not responder	high
TCGA-GU-A763	responder	low
TCGA-GU-A764	Not responder	high
TCGA-GU-A766	Not responder	low
TCGA-GU-A767	Not responder	high
TCGA-GU-AATO	Not responder	high
TCGA-GU-AATP	Not responder	high
TCGA-GU-AATQ	Not responder	high
TCGA-GV-A3JV	Not responder	high
TCGA-GV-A3JW	responder	high
TCGA-GV-A3JX	Not responder	low
TCGA-GV-A3JZ	Not responder	low
TCGA-GV-A3QF	responder	high
TCGA-GV-A3QH	responder	high
TCGA-GV-A3QI	Not responder	low
TCGA-GV-A3QK	Not responder	high
TCGA-GV-A40E	Not responder	high
TCGA-GV-A40G	responder	high
TCGA-GV-A6ZA	responder	low
TCGA-H4-A2HO	responder	high
TCGA-H4-A2HQ	Not responder	high
TCGA-HQ-A2OE	responder	high
TCGA-HQ-A2OF	responder	high
TCGA-HQ-A5ND	responder	high
TCGA-HQ-A5NE	Not responder	high
TCGA-K4-A3WS	Not responder	high
TCGA-K4-A3WU	Not responder	high
TCGA-K4-A3WV	Not responder	low
TCGA-K4-A4AB	Not responder	high
TCGA-K4-A4AC	responder	low
TCGA-K4-A54R	Not responder	high
TCGA-K4-A5RH	Not responder	low
TCGA-K4-A5RI	Not responder	high
TCGA-K4-A5RJ	Not responder	low
TCGA-K4-A6FZ	Not responder	low
TCGA-K4-A6MB	Not responder	high
TCGA-K4-A83P	Not responder	high
TCGA-K4-AAQO	Not responder	low
TCGA-KQ-A41N	Not responder	low
TCGA-KQ-A41O	responder	low
TCGA-KQ-A41P	Not responder	high
TCGA-KQ-A41Q	responder	low
TCGA-KQ-A41R	responder	high
TCGA-KQ-A41S	Not responder	high
TCGA-LC-A66R	Not responder	low
TCGA-LT-A5Z6	responder	high
TCGA-LT-A8JT	responder	low
TCGA-MV-A51V	responder	high
TCGA-PQ-A6FI	responder	low
TCGA-PQ-A6FN	Not responder	high
TCGA-R3-A69X	Not responder	high
TCGA-S5-A6DX	Not responder	low
TCGA-S5-AA26	Not responder	low
TCGA-SY-A9G0	Not responder	high
TCGA-SY-A9G5	Not responder	high
TCGA-UY-A78K	Not responder	high
TCGA-UY-A78L	Not responder	high
TCGA-UY-A78M	Not responder	high
TCGA-UY-A78N	Not responder	high
TCGA-UY-A78O	responder	high
TCGA-UY-A78P	Not responder	low
TCGA-UY-A8OB	Not responder	low
TCGA-UY-A8OD	Not responder	high
TCGA-UY-A9PA	Not responder	low
TCGA-UY-A9PB	Not responder	high
TCGA-UY-A9PD	Not responder	high
TCGA-UY-A9PE	Not responder	high
TCGA-UY-A9PF	responder	high
TCGA-UY-A9PH	Not responder	low
TCGA-XF-A8HB	responder	low
TCGA-XF-A8HC	responder	high
TCGA-XF-A8HD	Not responder	high
TCGA-XF-A8HE	Not responder	high
TCGA-XF-A8HF	Not responder	low
TCGA-XF-A8HG	responder	low
TCGA-XF-A8HH	Not responder	high
TCGA-XF-A8HI	responder	low
TCGA-XF-A9SH	responder	low
TCGA-XF-A9SI	Not responder	low
TCGA-XF-A9SJ	Not responder	high
TCGA-XF-A9SK	Not responder	low
TCGA-XF-A9SL	Not responder	high
TCGA-XF-A9SM	Not responder	low
TCGA-XF-A9SP	Not responder	high
TCGA-XF-A9ST	Not responder	high
TCGA-XF-A9SU	Not responder	high
TCGA-XF-A9SV	Not responder	high
TCGA-XF-A9SW	Not responder	high
TCGA-XF-A9SX	Not responder	high
TCGA-XF-A9SY	Not responder	high
TCGA-XF-A9SZ	Not responder	high
TCGA-XF-A9T0	responder	high
TCGA-XF-A9T2	Not responder	high
TCGA-XF-A9T3	Not responder	high
TCGA-XF-A9T4	Not responder	high
TCGA-XF-A9T5	Not responder	low
TCGA-XF-A9T6	Not responder	high
TCGA-XF-A9T8	Not responder	low
TCGA-XF-AAME	Not responder	high
TCGA-XF-AAMG	Not responder	low
TCGA-XF-AAMH	Not responder	high
TCGA-XF-AAMJ	Not responder	high
TCGA-XF-AAML	responder	high
TCGA-XF-AAMQ	Not responder	low
TCGA-XF-AAMR	Not responder	high
TCGA-XF-AAMT	Not responder	high
TCGA-XF-AAMW	Not responder	high
TCGA-XF-AAMX	Not responder	high
TCGA-XF-AAMY	Not responder	high
TCGA-XF-AAMZ	responder	low
TCGA-XF-AAN0	Not responder	high
TCGA-XF-AAN1	responder	high
TCGA-XF-AAN2	responder	low
TCGA-XF-AAN3	Not responder	high
TCGA-XF-AAN4	Not responder	high
TCGA-XF-AAN5	responder	low
TCGA-XF-AAN7	Not responder	high
TCGA-XF-AAN8	Not responder	high
TCGA-YC-A89H	Not responder	low
TCGA-YC-A8S6	Not responder	low
TCGA-YC-A9TC	Not responder	low
TCGA-YF-AA3L	responder	low
TCGA-YF-AA3M	Not responder	high
TCGA-ZF-A9R0	responder	high
TCGA-ZF-A9R1	Not responder	high
TCGA-ZF-A9R2	responder	low
TCGA-ZF-A9R3	responder	high
TCGA-ZF-A9R4	responder	low
TCGA-ZF-A9R5	responder	low
TCGA-ZF-A9R7	Not responder	low
TCGA-ZF-A9R9	Not responder	high
TCGA-ZF-A9RC	Not responder	high
TCGA-ZF-A9RD	Not responder	low
TCGA-ZF-A9RE	responder	high
TCGA-ZF-A9RF	Not responder	low
TCGA-ZF-A9RL	responder	low
TCGA-ZF-A9RM	responder	high
TCGA-ZF-A9RN	responder	high
TCGA-ZF-AA4N	responder	high
TCGA-ZF-AA4R	Not responder	high
TCGA-ZF-AA4T	responder	high
TCGA-ZF-AA4U	responder	high
TCGA-ZF-AA4V	responder	high
TCGA-ZF-AA4W	Not responder	low
TCGA-ZF-AA4X	responder	high
TCGA-ZF-AA51	Not responder	low
TCGA-ZF-AA52	Not responder	high
TCGA-ZF-AA53	Not responder	low
TCGA-ZF-AA54	Not responder	high
TCGA-ZF-AA56	responder	high
TCGA-ZF-AA58	Not responder	low
TCGA-ZF-AA5H	Not responder	low
TCGA-ZF-AA5N	responder	low
TCGA-ZF-AA5P	Not responder	high
