# Supplementary material for: Identification of an IRGP Signature to Predict Prognosis and Immunotherapeutic Efficiency in Bladder Cancer
Source: Front Mol Biosci. 2021 Apr 15;8:607090. doi: 10.3389/fmolb.2021.607090 (PMC8082411; doi:10.3389/fmolb.2021.607090)
Supplement: Supplementary File 3 — The raw data of immune cell infiltration CIBERSORT algorithm scores. [file Table_3.XLSX]

## Sheet: Sheet1
	TCGA.CF.A5U8	TCGA.ZF.A9R7	TCGA.G2.A2EK	TCGA.ZF.A9R4	TCGA.GU.A763	TCGA.K4.A5RJ	TCGA.GV.A3JZ	TCGA.CF.A5UA	TCGA.BT.A3PJ	TCGA.XF.AAN5	TCGA.FD.A3N6	TCGA.DK.A6B0	TCGA.4Z.AA89	TCGA.CF.A47X	TCGA.CF.A47V	TCGA.CF.A47Y	TCGA.FD.A43X	TCGA.UY.A9PH	TCGA.E7.A6ME	TCGA.ZF.A9R5	TCGA.DK.A6B6	TCGA.DK.A1AG	TCGA.KQ.A41O	TCGA.4Z.AA7W	TCGA.GC.A3RC	TCGA.GC.A3WC	TCGA.BT.A42E	TCGA.ZF.AA58	TCGA.ZF.A9R2	TCGA.CU.A0YR	TCGA.C4.A0F7	TCGA.XF.A8HI	TCGA.E7.A519	TCGA.4Z.AA7Y	TCGA.4Z.AA81	TCGA.E7.A7DU	TCGA.GC.A3I6	TCGA.E7.A678	TCGA.LC.A66R	TCGA.ZF.A9RL	TCGA.4Z.AA7O	TCGA.DK.A1AA	TCGA.GD.A76B	TCGA.FD.A62N	TCGA.E7.A85H	TCGA.GU.A766	TCGA.YC.A8S6	TCGA.LT.A8JT	TCGA.UY.A8OB
TMEscoreB	-0.128277	0.12351	0.483224	-0.0472453	0.0291911	0.0568886	0.0240168	-0.264579	0.0258793	-0.000721986	-0.0865976	0.338684	-0.0772315	0.15959	0.346348	0.0545875	-0.126777	0.0928276	-0.111648	0.0695851	0.0433254	0.163966	-0.227857	0.061885	0.332326	0.0549464	-0.0721928	0.418436	-0.191241	0.0191887	0.0386919	0.048841	0.0605469	0.0245347	0.106063	-0.238666	-0.112647	-0.203458	-0.00759925	0.048909	0.109388	0.0162464	0.0379016	0.0330377	-0.0736949	0.243973	0.0778995	0.0527801	0.246409
CD_8_T_effector	0.531086	-0.424195	-0.425573	-0.412192	-0.404211	-0.113162	-0.410757	-0.2483	0.0026422	1.4017	-0.401844	-0.41885	1.80406	-0.41927	-0.355893	-0.0849665	-0.407101	-0.0858509	-0.402035	0.521349	-0.28315	-0.384329	-0.390722	-0.353945	-0.363448	-0.274841	-0.379025	-0.28665	-0.385431	-0.419535	-0.253727	0.0172576	-0.314468	2.42606	-0.419167	-0.139244	-0.382519	-0.150487	-0.350748	-0.122892	-0.34527	-0.0911484	-0.405471	-0.0625834	-0.329329	-0.418485	1.72183	0.209299	-0.397821
Immune_Checkpoint	0.249579	-0.654448	-0.649397	-0.575093	-0.633432	-0.0989452	-0.542982	0.417424	-0.407698	0.834369	-0.613885	-0.665526	4.10171	-0.648412	-0.503075	0.629365	-0.426709	-0.414726	-0.266804	1.65849	0.126201	-0.57544	-0.419832	-0.455085	-0.440203	0.326	-0.327001	-0.110884	-0.0616751	-0.586773	-0.16819	0.283296	-0.572733	4.51583	-0.636806	-0.242455	-0.323337	-0.259594	-0.439896	0.818679	-0.391565	-0.415388	-0.461311	-0.251257	0.124024	-0.614634	1.11891	-0.120464	-0.63859
Antigen_processing_machinery	1.71445	-0.844661	-0.84031	0.113766	-0.929322	-0.559038	-0.808592	-0.21835	0.530549	0.373712	-0.740339	-1.00075	2.88331	-0.478806	-0.195366	2.20622	-0.444194	0.0292042	-0.874093	1.15631	-0.79434	0.23949	0.793164	-0.335545	-0.827338	0.26647	-0.784482	-0.422766	-0.479775	-0.813019	-0.570736	-0.433584	-0.7447	1.51993	-0.464051	0.402235	-0.410794	1.14963	-0.379856	-0.212918	-0.292682	-0.352855	-0.812652	0.415525	-0.17945	-0.912069	2.13924	-0.356971	-0.729836
TMEscoreA	-0.0657868	-0.0913549	-0.0935138	-0.0901078	-0.0786054	-0.0803468	-0.0723529	0.0269192	-0.0856707	-0.0552909	-0.0857495	-0.0879494	-0.0577804	-0.0889055	-0.0873846	-0.0868245	-0.0715796	-0.0691474	-0.0777066	0.214444	-0.0872698	-0.0956469	-0.0786458	-0.0773471	-0.0841655	0.0904575	-0.0765557	0.402778	0.143367	-0.0691569	-0.0794021	-0.0509421	-0.0869886	-0.0287611	-0.0884816	-0.081608	0.107789	-0.0730516	-0.0512636	-0.0804276	-0.081122	-0.0720739	-0.0803181	-0.0701271	-0.0710533	-0.0900461	-0.0292948	0.0846243	-0.0897812
Mismatch_Repair	-0.513741	-0.604465	-0.253957	-0.577723	-0.323488	0.471644	0.0724731	-1.02572	-0.199925	-0.475281	-0.252334	0.988101	-0.603326	0.0715195	0.38318	1.44008	0.0877809	-0.685535	-0.426278	1.55698	0.846113	-0.673792	-0.0882618	-0.827982	-0.649611	0.0533906	-0.960901	1.94701	-0.649316	2.06645	-0.436506	-0.530091	-0.14893	-0.351054	-1.31817	-0.958793	0.417116	-0.407243	-0.317346	0.581349	-0.295068	-0.53619	0.875991	-0.748163	-0.295031	0.004029	0.588179	-0.451453	-0.237578
Nucleotide_excision_repair	-0.536288	-0.597292	-0.294577	-0.573934	-0.306604	0.542127	0.0502006	-1.06178	-0.241597	-0.44316	-0.259712	0.96452	-0.577501	0.0378848	0.422948	1.42683	0.138541	-0.742474	-0.32735	1.52359	0.869568	-0.706818	-0.0173867	-0.855465	-0.624939	0.0761878	-0.963615	1.92897	-0.634751	2.00501	-0.405498	-0.537708	-0.111799	-0.34334	-1.35891	-0.971558	0.445154	-0.425913	-0.28487	0.609524	-0.277301	-0.514345	0.948919	-0.77601	-0.282709	0.0723478	0.583613	-0.439635	-0.229556
DNA_damage_response	-0.470699	-0.448825	-0.287849	-0.570678	-0.443372	0.61898	-0.0840755	-1.0667	-0.258068	-0.635189	0.0321131	0.973585	-0.63514	0.0900761	0.784061	1.19558	0.0827388	-0.786413	-0.408642	1.40786	0.914475	-0.700309	-0.230453	-0.768648	-0.684428	0.25286	-1.11975	2.03678	-0.644361	2.02789	-0.496622	-0.578366	-0.0120203	-0.237119	-1.34986	-0.929462	0.37018	-0.4323	-0.078857	0.77117	-0.135724	-0.568757	1.39832	-0.605127	-0.394245	0.0431897	0.52123	-0.527743	-0.0932221
DNA_replication	-0.552776	-0.538061	-0.43311	-0.631493	-0.452768	0.467338	0.251663	-1.11534	-0.217467	-0.487485	-0.11266	0.97432	-0.438579	0.0132251	0.588993	1.34795	0.054418	-0.899083	-0.193808	1.35366	0.959708	-0.755583	-0.181253	-0.982093	-0.657445	0.147671	-1.03161	1.91301	-0.659382	1.76947	-0.512351	-0.291244	-0.142531	-0.282858	-1.28146	-1.09779	0.264756	-0.512057	-0.146615	0.818068	-0.184307	-0.55213	1.39697	-0.631687	-0.325977	-0.103543	0.725465	-0.50285	-0.196002
Base_excision_repair	-0.440005	-0.522645	-0.271839	-0.641732	-0.379623	0.497141	-0.0473058	-1.07499	-0.229805	-0.53267	-0.0224457	0.988854	-0.644476	0.0330943	0.650418	1.27459	0.11015	-0.691063	-0.501873	1.51486	0.902484	-0.645912	-0.260104	-0.857018	-0.726557	0.159596	-1.0674	1.95837	-0.648688	2.14862	-0.486616	-0.535398	-0.172409	-0.299463	-1.32064	-0.941043	0.406881	-0.437243	-0.227233	0.571399	-0.199631	-0.58574	0.980294	-0.697289	-0.456337	-0.0227274	0.521794	-0.506452	-0.141232
Pan_F_TBRs	0.278458	-0.147741	0.0310266	1.11546	-0.402254	0.310733	-0.260613	-0.669254	0.995734	1.00371	-1.16964	0.673616	0.903141	-0.436329	-1.08822	-1.25369	0.560758	-0.102869	-0.816243	-0.726593	-0.240137	1.17699	-0.389594	-0.427912	-0.943746	-0.990839	-1.03664	-1.20087	-0.90868	-0.804272	2.35692	-0.932277	-0.0437137	-1.04914	-0.124975	0.815041	-0.649128	2.83383	-0.612271	-0.717074	-0.206741	1.41938	-1.02727	-0.250052	-0.431837	2.11253	-1.03455	0.593645	-0.526132
EMT	-0.363909	-0.586348	-0.369514	-0.151163	-0.373435	-0.18536	-0.130706	0.0063543	-0.128004	-0.1633	-0.343327	-1.08325	-0.68391	-0.913326	-1.20362	-0.86368	0.0893548	-0.364958	-0.932584	0.451098	-0.491355	-0.451446	-1.56672	-0.0309684	-0.387418	2.28296	-0.148183	0.174666	2.624	0.291585	-0.0269049	0.163409	-0.173761	1.06931	-0.161825	0.110458	-0.267717	0.0941008	-0.0521892	-0.241807	-0.349392	0.607501	0.366775	-0.0569203	-0.821371	-1.09949	0.166002	0.533973	-0.565212
[truncated: 352 more columns]
